# 1 Molecular mechanism of high affinity sugar 2 transport in plants unveiled by structures of 3 glucose/H<sup>+</sup> symporter STP10

4 Laust Bavnhøj<sup>1</sup>, Peter Aasted Paulsen<sup>1</sup>, Jose C. Flores-Canales<sup>2</sup>, Birgit Schiøtt<sup>2</sup>, and  
5 Bjørn Panyella Pedersen<sup>1,\*</sup>

6 <sup>1</sup>Department of Molecular Biology and Genetics, Aarhus University, Gustav Wieds Vej 10, DK-8000 Aarhus C,  
7 Denmark.

8 <sup>2</sup>Department of Chemistry, Aarhus University, Langelandsgade 140, DK-8000 Aarhus C, Denmark.

9 \*Correspondence to: [bpp@mbg.au.dk](mailto:bpp@mbg.au.dk)

## 10 ABSTRACT

Sugars are essential sources of energy and carbon, and also function as key signaling molecules in plants. Sugar Transport Proteins (STP) are proton-coupled symporters, solely responsible for uptake of glucose from the apoplastic compartment into cells in all plant tissues. They are integral to organ development in symplastically isolated tissues such as seeds, pollen and fruit. Additionally, STPs play a significant role in plant responses to both environmental stressors such as dehydration, and prevalent fungal infections like rust and mildew. Here, we present two high-resolution crystal structures of the outward-occluded and inward-open conformations of  
11 *Arabidopsis thaliana* STP10 with glucose and protons bound. The two structures describe key states in the STP transport cycle. Together with *in vivo* biochemical analysis and Molecular Dynamics simulations they pinpoint structural elements that explain how STPs exhibit high affinity for sugar binding on the extracellular side and how it is considerably lowered on the intracellular side to facilitate substrate release. These structural elements, conserved in all STPs across plant species, clarify the basis of proton-to-glucose coupling, essential for symport. The results advance our understanding of a key molecular mechanism behind plant organ development, and sets the stage for novel bioengineering strategies in crops that could target seeds, fruits and plant resistance to fungal infections.

## 12 Introduction

13 Correct plant development requires the ability to sense the carbon level of the entire organism. Central to this is a  
14 two-step process after unloading of sucrose from the phloem; apoplastic sucrose is enzymatically hydrolyzed to  
15 glucose and fructose, then imported into sink tissues by STPs<sup>1,2</sup>. This tightly regulated process is the main driver  
16 of monosaccharide uptake, and is essential for correct organ development such as pollen and seed development<sup>3,4</sup>.  
17 Besides organ development, STPs function in a wide range of other physiological processes. In guard cells, glucose  
18 import by STPs provide carbon sources for starch accumulation and light-induced stomatal opening that is essential  
19 for plant growth<sup>5</sup>. STPs play a role in senescence, programmed cell death and participate in the recycling of sugars  
20 derived from cell wall degradation<sup>6-8</sup>. STPs and related proteins are implicated in a range of physiological plant  
21 responses to environmental stressors, including osmoregulation, salt tolerance, dehydration response and cold  
22 response<sup>9</sup>. Sugar uptake by wound and pathogen induced STPs is a central plant immunity strategy; by keeping the  
23 apoplast free of sugars, apoplastically growing pathogens like *Pseudomonas syringae* are nutritionally deprived<sup>10-17</sup>.  
24 Biotrophic pathogens like the agriculturally important fungi rust and mildew exploit this plant defense mechanism  
25 using specialized cell wall penetrating structures called haustoria<sup>18-20</sup>.

26 The STPs are prominent members of the Sugar Porter (SP) family (also called the MST(-like) family in  
27 plants)<sup>21,22</sup>. STPs have a broad pH optimum and display significantly higher sugar affinity (up to 1000x fold)  
28 compared to known SP members from other kingdoms<sup>8,23-25</sup>. *Arabidopsis thaliana* STP10 is a canonical STP found  
29 in primordia of lateral roots and in pollen tubes. It is a proton driven symporter with a broad pH optimum and

30 with a low  $\mu\text{M}$  range affinity for glucose. It also has the ability to transport galactose and mannose<sup>25</sup>. We recently  
31 published the structure of STP10 which shows that STPs have a Major Facilitator fold with 12 transmembrane  
32 helices constituting two domains, the N domain (helices M1-M6) and the C domain (helices M7-M12), connected  
33 by a cytosolic helical bundle domain (IC1-IC5)<sup>26</sup> (Fig. 1a). On the apoplastic side, a Lid domain (L1-L3) links  
34 the N domain to the C domain by a disulfide bridge. Glucose transport could be linked to the protonation of an  
35 acidic residue (Asp42) on the M1 helix<sup>26</sup>. The molecular mechanism by which STPs mediate high affinity glucose  
36 transport in conjunction with protons is unknown, but has decisive implication on the function of STPs in organ  
37 development and plant pathogen defense mechanisms. Here we present a 1.8 Å resolution outward facing structure  
38 of STP10, together with a 2.6 Å resolution structure of STP10 in an inward facing conformation, both with glucose  
39 bound. The two structures capture two key conformational states in glucose translocation (Fig. 1b). In combination  
40 with biochemical characterization and Molecular Dynamics simulations, we show that both structures represent  
41 glucose and proton bound states, and address the molecular mechanism of glucose import by STPs.

## 42 Results and Discussion

### 43 Structures of STP10

44 We determined the crystal structure of STP10 in two different substrate-bound conformations: outward occluded  
45 at 1.8 Å and inward open at 2.6 Å resolution (Extended Data Fig. S2). The new outward occluded structure is  
46 overall similar to the previously published structure with an r.m.s.d. ( $C\alpha$ ) of 0.396 Å. However the improved very  
47 high resolution of 1.8 Å provides a highly detailed atomic structure of STP10 (residues 21-507, Rfree 21.2%) (Fig.  
48 1c, Extended Data Figs. S3 and S4, Extended Data Table S1). The structure includes a glucose molecule in the  
49 central binding pocket with the N and C domains clamped around it (Fig. 1e). Exit from the binding site towards the  
50 cytosol is completely blocked and held in place by several strong interactions, including three prominent salt bridges  
51 between the N and C domain at the cytosolic interface (Fig. 1 and Extended Data Fig. S5a). The residues that  
52 create the salt bridges are strictly conserved in all Sugar Porters, and constitute the canonical MFS and Sugar Porter  
53 signature motifs called the A motif and SP motif, respectively (Extended Data Fig. S1)<sup>27</sup>. In other SP proteins, these  
54 residues play a central role in stabilizing an outward facing conformation, and we hypothesized that disruption of  
55 this salt bridge network should facilitate arrest of STP10 in an inward-facing state<sup>23,28-35</sup>. To test this, we created  
56 an STP10 double mutant (E162Q/D344N) and measured *in vivo* activity. The double mutant abolishes transport  
57 activity, supporting a conformational arrest of the transporter (Extended Data Fig. S6a), and the double mutant  
58 readily crystallized in an inward-open conformation. The structure was refined to 2.6 Å resolution (residues 16-500,  
59 Rfree 27.79%) (Fig. 1c, Extended Data Figs. S3 and S4, Extended Data Table S1). Map quality is high except for  
60 a part of the Lid domain (residues 64-73) which is poorly defined, indicative of high flexibility (Extended Data  
61 Fig. S3b). In the inward open conformation, the N and C domains tightly interact at the apoplastic side forming an  
62 inverse V-shaped structure with an open cavity extending 25 Å from the cytosol to the binding site (Fig. 1c,e). In  
63 this central binding site, a single glucose molecule is present.

64 The two obtained conformations represent the two major states in a transport mechanism that cover the  
65 translocation of glucose from the apoplastic space to the cytosol (Fig. 1b). Structural alignment between them  
66 show intradomain rearrangement of the Lid domain, ICH domain, N domain and C domain during the transition  
67 (Fig. 1d,f). The M2-Lid region and helix-loop-helix region of M9-M10 display dramatic rearrangement, while  
68 significant differences are also observed in M1, region M7b-M8 and region M11-M12 (Fig. 1d,f). In the inward  
69 open conformation, IC1, IC2, and IC5 maintain a well-defined and similar conformation with respect to the N and  
70 C domains, but region IC3-IC4 are stretched compared to the outward conformation to allow STP10 to open to  
71 the cytosol (Fig. 1c,d,f). The two structures reveal that the domains of STP10 remain rigid in large areas, while  
72 exhibiting local rearrangements linked to glucose and proton translocation during the transport cycle. While the Lid  
73 domain undergoes large movements between the two conformations the Cys77(Lid)-Cys447(M11) disulfide bridge,  
74 which links the Lid and N domain to the C domain, is well defined and clearly visible in both conformations (Fig.  
75 2a).

76 In the inward open structure, the glucose density matches the density of the glucose molecule bound in the

77 outward occluded state of STP10, there is no difference in binding pose of the sugar (Fig. 2a-c, Extended Data Fig.  
78 S4). In both states, interactions between protein and glucose are primarily mediated by C domain residues from M7,  
79 M8, M10 and M11 that make multiple polar contacts to the glucose. No side chain rearrangements are observed  
80 during transition (Fig. 2a,b). From the N domain, a few specific interactions with M1 and M5 dominate (Fig. 2a).  
81 The inward open substrate bound structure shows that during transition, Phe39(M1) and Gln177(M5) move from  
82 close contact with glucose (distances of 3.9 Å and 2.6 Å), to more than 8 Å and 10 Å away from the glucose, while  
83 Leu43(M1) and Ile184(M5) maintain close contact (Fig. 2c). The displacement of Phe39 and Gln177 lower the  
84 affinity towards the substrate significantly, supported by uptake assays. The F39A and Q177A mutants lead to an  
85 almost 8-fold ( $K_m$  154  $\mu$ M) and 37-fold ( $K_m$  737  $\mu$ M) reduction in affinity, compared to STP10 WT ( $K_m$  20  $\mu$ M)  
86 (Fig. 2d). In comparison, the I184A mutant reduced affinity by 3-fold (Fig. 2d).

### 87 **The proton site is protonated in both substrate-bound conformations**

88 The proton site, constituted by proton donor/acceptor pair Asp42(M1) and Arg142(M4) is essential for the transport  
89 ability of STP10<sup>26</sup>. To elucidate the mechanism of proton driven symport, a cornerstone condition is to establish  
90 the protonation state of the solved substrate bound structures. In the outward occluded conformation of STP10,  
91 crystallized at pH 4.0, the carboxyl-group oxygen atoms of Asp42 and the guanidine group nitrogen atoms of Arg142  
92 are 4.7 Å apart and stabilized by an acetate ion from the crystallization cocktail (Figs. 2c and 3a). In the inward open  
93 substrate-bound state, crystallized at pH 9.0, this distance is maintained at 5.3 Å (Figs. 2c and 3b). This distance  
94 reflects the protonation state, and suggests that Asp42 is neutralized by a proton, as Asp42 is expected to move closer  
95 to form a salt bridge with Arg142 in its negatively charged state<sup>26,36</sup>. To test this hypothesis, we used molecular  
96 dynamics (MD) simulations. Ten independent repeats for the outward and inward state with Asp42 either neutral or  
97 charged were carried out over approximately 2  $\mu$ s (accumulated simulation time 80  $\mu$ s). When Asp42 is neutral in  
98 both outward occluded and inward conformations, Asp42 and Arg142 maintain a broad distance distribution with  
99 a median distance of 5-7 Å (Fig. 3c,d). In particular, in the outward conformation the large distribution reflects  
100 the flexibility between the M1 and M4 helices. With a negatively charged state of Asp42 in both conformations  
101 conversely, the distance is consistently reduced with a extremely narrow distance distribution centered around a  
102  $\sim$ 2.8 Å salt bridge interaction of Asp42-Arg142 that is formed rapidly and maintained throughout all simulations  
103 (Fig. 3c,d). We followed this up by calculating the  $pK_a$  of Asp42 using the free energy perturbation (FEP) method  
104 and an ensemble of five independent calculations (Extended Data Table S2). The results predict that Asp42 has  
105 a  $pK_a$  of 8.7 (+/- 0.3) in the outward state, and a  $pK_a$  of 14 (+/- 1) in the inward state. A continuum electrostatic  
106 calculation on the crystal structures predicts Asp42  $pK_a$  values of 6.8 and 8.8 for the outward and inward states,  
107 respectively, showing a similar trend as the FEP results (Extended Data Figs. S8a,b). We conclude that the aspartate  
108 of the proton-site is neutralized by a proton in both conformations.

### 109 **Mechanism of occlusion links proton site to glucose site via Lid domain**

110 Next we sought to explain how the proton site is linked to full occlusion of the central glucose binding site during  
111 the transition from the outward to the inward facing conformation.

112 In the outward occluded conformation, the side chain of Arg142 is in contact with the backbones of conserved  
113 residues Phe87(M2) and Thr88(M2) (Fig. 3a). In the inward open state, Arg142 reorient to form polar contacts  
114 with the backbone of Asp42, but maintains the backbone interaction to Phe87 and Thr88 (Fig. 3b). This locks  
115 the movements of the flexible side chain of Arg142 to the M2 helix, and links proton site changes to M2. In the  
116 transition to inward-facing, this pulls the M2 helix towards the part of central cavity facing the exofacial side of the  
117 protein. This movement enables M2 and M11 to make polar interactions resulting in a pronounced kink in M11 of  
118 the inward facing conformation (Fig. 2a). Mutagenesis of Phe87 and Thr88 abolishes transport (Extended Data Fig.  
119 S6a).

120 In the outward occluded conformation, the Lid domain is clamped down on top of the protein with its hydrophobic  
121 L3 helix embedded between the extracellular region of the N and C domain (Figs. 1a and 2a). In the inward open  
122 conformation, the induced kink of M11 created by the proton site drives the Lid to disengage from the rest of  
123 the protein, and the L3 region is exposed to the extracellular space (Figs. 1a and 2a). The high b-factors of the

124 L2-L3 region in the inward open structure suggest high flexibility in this conformation (Extended Data Fig. S2c).  
125 The opening of the Lid domain is linked by the Cys77(L3)-Cys447(M11) disulfide bridge to the movements of  
126 M11. A bend at Pro308(M7b) is orchestrated by this event, that allows hydrophobic residues of M7b to occupy this  
127 space to complete the closure of the extracellular entrance to the glucose site. The introduced kink in M7 generates  
128 full closure towards the extracellular side, and is enabled by the proline side chain that breaks the alpha-helical  
129 hydrogen-bonding pattern. Mutating Pro308 led to a 4-fold reduction in affinity (Extended Data Fig. S6b). Overall,  
130 these movements link the proton site to the complete occlusion of the glucose binding site to provide isolation from  
131 the extracellular space.

132 The transition leads to a remarkable mimetic residue-swap in the protein: In the outward conformation,  
133 the conserved Tyr76(L3) forms a network of hydrophobic interactions to conserved residues which isolate the  
134 proton/donor pair and the saturated binding site from the extracellular space (Fig. 3e). During the transition and  
135 the release of the Lid, these interactions are replaced by a reshuffling and new interactions in the same network to  
136 Tyr306(M7b) (Fig. 3e). During the transition, the hydrophobic network thus acts as a dynamic outer gate; Tyr76(L3)  
137 is rearranged in the Lid domain by moving 19 Å, while Tyr306 from M7b takes its place to control access to the  
138 binding site during the transport cycle (Fig. 2a). The mutation of either of the tyrosines (Y76A and Y306A) led to  
139 significant impairment of transport activity with an almost identical 15-fold decrease in affinity ( $K_m \sim 300 \mu\text{M}$ ) (Fig  
140 3f). The F79A mutant was used as a negative control and retained affinity comparable to wild-type STP10 ( $K_m$  29  
141  $\mu\text{M}$ ) (Extended Data Fig. S6c).

#### 142 **A transient chloride site exist at the endofacial side of STP10**

143 In the inward open conformation of STP10, a strong spherical density is present between the SP motif and the A  
144 motif of the N domain (Fig. 4a). We replaced  $\text{Cl}^-$  with its chemical congener  $\text{Br}^-$  in our crystallization experiments,  
145 which gave rise to a single strong anomalous peak (8.72 sigma) at the position of this spherical density, allowing us  
146 to unambiguously identify this peak as a  $\text{Cl}^-$  ion (Fig. 4b,c). In contrast, the outward occluded structure does not  
147 contain this peak. Instead a fully conserved aspartate (D225) of the SP motif takes its place and interacts directly  
148 with the A motif residues, creating an 'SP-A network' that is expected to stabilize the outward conformation (Fig.  
149 4d, Extended Data Fig. S5b). It is noteworthy that the mutant D225N exhibits reduced glucose uptake due to a  
150 5-fold decrease in binding affinity ( $K_m$  101  $\mu\text{M}$ ) (Fig. 4e).

151 Interestingly, in the inward open structure, the Asp225 that is replaced by the chloride, points away from the  
152 A motif and interacts with a glucose headgroup of a detergent molecule (Extended Data Fig. S4b and Fig. 4c). It  
153 has been shown that direct interaction between lipid headgroups and the conserved cytoplasmic network affects  
154 the transition between conformational states in MFS members<sup>35,37</sup>, and while this observed interaction could be an  
155 artifact of the crystallization condition, our work support a tentative hypothesis where Asp225 of the SP motif can  
156 interact with intracellular glucose or lipid headgroups, modulating transport by a stabilization of the inward open  
157 state.

158 Another endofacial location also warrants our attention. Two cysteines, Cys288(M7) and Cys417(M10), at the  
159 intracellular interface of STP10 have thiol groups  $\sim 3.5 \text{ \AA}$  apart from each other in both conformations of STP10  
160 (Extended Data Fig. S4a). We do not observe any disulfide bridge, but the positioning is so striking that we speculate  
161 this may function as an intracellular cysteine-based redox regulation site. C288A and C417A mutants display a  
162 3-fold decrease in affinity ( $K_m \sim 60 \mu\text{M}$ ) suggesting an equivalent effect of mutating these residues (Extended Data  
163 Fig. S6d,e), but possible involvement in STP10 regulation will require further work. Intracellular cysteine-based  
164 redox regulation and signaling has been suggested to occur in plants<sup>38,39</sup>. The cysteine pair is conserved only in  
165 STP9, STP10 and STP11 and not found in other *A. thaliana* STPs. Sequence alignment shows that the cysteine  
166 pair is found in specific STPs across plant species, supporting a conserved model for isoform specific regulation  
167 (Extended Data Fig. S1).

#### 168 **Model of glucose transport by Sugar Transport Proteins**

169 On the basis of our findings, we propose the following comprehensive model for sugar transport by STPs (Fig. 5). In  
170 the outward open state, an open Lid domain allows for a water-filled inlet channel for sugar and protons to the binding



171 sites. Following binding of sugar, protonation and neutralization of Asp42 leads to liberation from the sidechain  
172 of Arg142 and distortion of the flexible M1b helix with Phe39, Leu43 and M5 with Ile184 and Gln177 towards  
173 glucose, locking it in and creating a high affinity binding pocket. The high affinity binding event orchestrated by the  
174 protonation of Asp42 induces movements of M7b, M2 and the outward facing region of the M11 helix that connect  
175 the C domain to the Lid domain by a disulfide bridge. This facilitates an enclosure of the Lid domain, mediated by  
176 the hydrophobic interactions of Tyr76 at the cavity entrance which locks the two transmembrane domains together. In  
177 this outward occluded state, the Lid domain isolates the protonation site from the extracellular space. The transition  
178 from outward occluded to the inward open state drives the Lid domain away from the entry site of the central cavity  
179 by the bending movement of M11 through the disulfide bridge. This transition is governed by Tyr76 and Tyr306  
180 that swap their position to maintain tight hydrophobic interactions between the central helices keeping both the  
181 protonation and binding site isolated from the extracellular space. The transition results in movements of N domain  
182 residues Leu43, Ile184 and especially Phe39 and Gln177 away from the bound substrate. This creates a transition  
183 from a high sugar binding affinity state to a considerably lowered affinity state in this inward open conformation and  
184 the sugar is released. In this inward open state, the SP-A network is broken, as Asp225 is flipped away from the A  
185 motif, and a chloride ion takes its position.

186 In MD simulations of the inward open state, bound glucose can escape to the intracellular side within a few  
187 hundred nanoseconds irrespective of the protonation state of Asp42, but a protonated Asp42 appears to favor sugar  
188 dissociation (Extended Data Fig. S7a,b). Unloading of glucose results in a displacement of the M1b helix away  
189 from the binding site, allowing the neutral Asp42 to move into close proximity of Arg142 which induces proton  
190 release. The sugar and consequent proton release reestablishes the interaction between Asp42 and Arg142 thereby  
191 destabilizing the inward open state. This shifts the transition equilibrium towards a more stable outward facing state  
192 that is favored by the networks of salt bridges and the N domain SP-A network at the intracellular side. The outward  
193 open state is then ready to allow substrate and protons to enter the central cavity for another transport cycle.

194 This transport mechanism is likely broadly conserved within the SP protein family found in all plants. Alongside  
195 STPs, the family also includes the ERD6-like, PMT, pGLcT, VGT, TST and INT subfamilies<sup>22</sup>. Members of these  
196 subfamilies can play determinant roles in plant development and tolerance to environmental stress. For instance,  
197 INT and ERD6-like members are involved in the regulation of cell elongation and in responses to abiotic stress  
198 like dehydration, respectively<sup>40,41</sup>. Our work pinpoints crucial structural elements, conserved across both protein  
199 subfamilies and plant species, and explain their importance for high sugar affinity transport (Extended Data Fig.  
200 S1). Strikingly, single point mutations in these key elements of the transport mechanism of STPs mediate rust and  
201 mildew resistance in wheat and barley, and our work provides the foundation for leveraging this knowledge in new  
202 bioengineering strategies in crops<sup>12,20</sup>.

203 In conclusion, we have presented two key state structures of a STP protein together with biochemical and  
204 Molecular Dynamics simulations that explain high affinity glucose transport in plants. The continued structural and  
205 functional characterization of plant sugar transporters is key not only for a molecular understanding of fundamental  
206 physiological processes in all plants, but also from an applied point of view to address future challenges in biotech,  
207 agriculture and environmental sciences.

## 208 **Acknowledgements**

209 The authors acknowledge beamlines I24 and I04 at the Diamond Light Source and beamline BioMAX at the MAX  
210 IV Laboratory, where X-ray data were collected, as well as DESY-PETRA III for crystal screening. This work was  
211 supported by funding from the European Research Council (grant agreement No. 637372), the Danish Council  
212 for Independent Research (grant agreement No. DFF-4002-00052), the Carlsberg Foundation (CF17-0180), and  
213 an AIAS fellowship to B.P.P. Novo Nordisk Foundation (NNF18OC0052988), the Villum Foundation (project  
214 number 34326), and the Independent Research Fund Denmark, Natural Sciences (7014-00192B) supported J.C.F.-C.  
215 Computations were performed at the Grendel-S cluster of the Centre for Scientific Computing Aarhus (CSC-AA),  
216 and made possible by a grant from the Novo Nordisk Foundation (NNF18OC0032608).

## 217 **Author contributions**

218 L.B. did crystallization experiments, processed data, and biochemical characterization. P.A.P. did crystallization  
219 experiments and processed data. J.C.F.-C. performed molecular dynamics simulations. B.S. supervised the molecular  
220 dynamics simulations. B.P.P. supervised the project. L.B. and B.P.P. wrote the paper. All authors commented on the  
221 paper.

## 222 **Author information**

223 Coordinates and structure factors have been deposited in the Protein Data Bank with the accession numbers 7AAQ  
224 (outward) and 7AAR (inward). The authors declare no competing interests. Correspondence and requests for  
225 materials should be addressed to B.P.P. ([bpp@mbg.au.dk](mailto:bpp@mbg.au.dk)).

## 226 **Methods**

### 227 **Protein Purification**

228 The gene encoding *Arabidopsis thaliana* STP10 (UniProt: Q9LT15) was introduced into an expression construct  
229 based on p423\_GAL1 with a C-terminal purification tag containing a thrombin cleavage site and a deca-histidine  
230 tag. To obtain the inward open state the mutations E162Q and D344N were introduced using the quickchange  
231 site-directed mutagenesis kit (Agilent). Transformed *Saccharomyces cerevisiae* (strain DSY-5) were grown in a  
232 culture vessel to high density by fed-batch and harvested after a 22 hour induction using galactose<sup>42</sup>. Harvested  
233 cells were washed in cold water, spun down and re-suspended in lysis buffer (100 mM Tris pH 7.5, 600 mM  
234 NaCl, 1.2 mM phenylmethylsulphonyl fluoride (PMSF)), followed by lysing using bead beating with 0.5 mm glass  
235 beads. The homogenate was centrifuged for 20 minutes at 5,000g, followed by sedimentation of membranes by  
236 ultracentrifugation at 200,000g for 2 h. Membrane pellets were re-suspended in membrane buffer (50 mM Tris  
237 pH 7.5, 500 mM NaCl, 20% glycerol) before being frozen in liquid nitrogen. 9 grams of frozen membranes were  
238 thawed and solubilized for 30 minutes in a solubilization buffer (150 mM NaCl, 50 mM Tris pH 7.5, 5% Glycerol,  
239 50 mM D-glucose, 1% n-dodecyl- $\beta$ -d-maltoside (DDM) and 0.1% Cholesterol hemi succinate (CHS)) in a total  
240 volume of 100 ml, after which insolubilized materials were removed by filtration using a 1.2  $\mu$ m filter. 20 mM  
241 imidazole pH 7.5 was added and the solubilized membranes were loaded on a pre-equilibrated 5 ml Ni-NTA column  
242 (GE Healthcare) at 3 ml/minute. After loading, the column was washed with 10 column volumes of W60 buffer  
243 (Solubilization buffer with 0.1% DDM and supplemented with 60 mM Imidazole pH 7.5), followed by a 20 column  
244 volumes wash with G-buffer (20 mM Mops pH 7.5, 250 mM NaCl, 10% Glycerol, 0.12% Octyl Glucose Neopentyl  
245 Glycol (OGNG), 0.012% CHS, 0.5 mM tris(2-carboxyethyl)phosphine (TCEP)). The composition of the G-buffer  
246 was optimized through a thermostability assay<sup>43</sup>. The protein was eluted from the column by circulating 5 ml  
247 G-buffer supplemented with bovine thrombin and 20 mM Imidazole pH 7.5, at 19°C for ~16 hours. The following  
248 day the column was washed with 15 ml of G-Buffer supplemented with 40 mM imidazole. The samples were  
249 pooled and concentrated using a spin column (50 kDa cut-off, Vivaspin) to a volume of ~400  $\mu$ l and injected on a  
250 size-exclusion column (Enrich 650, Biorad), pre-equilibrated in G-buffer. For anomalous experiments to confirm the  
251 Cl<sup>-</sup> site, protein was purified using an identical protocol, but exchanging the G-buffer solution MgCl<sub>2</sub> to MgBr<sub>2</sub> and  
252 NaCl to NaBr.

### 253 **Crystallization**

#### 254 **Outward occluded state**

255 The peak fractions from SEC were concentrated to ~15 mg/ml using a 50 kDa concentrator (Vivaspin). The  
256 outward open state of STP10 was crystallized in lipidic cubic phase (LCP). To prepare lipidic cubic phase for  
257 crystallization trials, the protein was supplemented with 100 mM D-glucose before mixing with a 80% monoolein  
258 (Sigma-Aldrich) 20% cholesterol mixture, in 1:1.5 protein to lipid/cholesterol ratio (w/w) using a syringe lipid mixer.  
259 For crystallization, 50 nl of the meso phase was mixed with 1000 nl of crystallization buffer for each condition  
260 on glass sandwich plates using a Gryphon robot (ARI). Tiny crystals appeared after one-two days at 20°C. These  
261 crystals diffracted to ~3 Å at Diamond Light Source beamline I24. The crystallization conditions were further  
262 optimized and the final optimized crystallization screen contained 0.1-0.15 M Ammonium Acetate, 0.1 M Sodium  
263 Citrate pH 4.0 and 36-40% PEG400. This gave crystals with a size of approximately 100x40x40  $\mu$ m. The crystals  
264 were collected using dual thickness micromounts (MiTeGen) and immediately flash frozen in liquid nitrogen. These  
265 crystals diffracted to better than 2 Å with a few crystals diffracting anisotropic to 1.6 Å. The final datasets were  
266 collected at Diamond Light Source beamline I24 using a wavelength of 0.9686 Å.

#### 267 **Inward open state**

268 Peak fractions from SEC with 4-5 mg/ml of protein was used directly for crystallographic experiments. Crystals  
269 were grown at 20°C by vapor diffusion in 0.6+0.6  $\mu$ l sitting drops using MRC Maxi Optimization plates (SWISSCI).  
270 The crystals appeared using reservoirs containing 0.3 M NaCl, 0.1 M MgCl<sub>2</sub>, 0.1 M Bicine pH 9.0 and 36-43%  
271 PEG400. The crystals appeared after one day and grew to a final size of 150x60x60  $\mu$ m within 14 days. Data were  
272 collected at the Diamond Light Source Beamlines I04 and I24. Crystals that had grown for 3 days diffracted to

273 3-4 Å whereas crystals that had grown for 14 days diffracted to 2.5-3 Å. One data set was collected from a single  
274 crystal with diffraction to 2.64 Å using a wavelength of 0.98 Å. For anomalous experiments to confirm the Cl<sup>-</sup> site,  
275 crystals were grown using an identical protocol, but exchanging the reservoir solution MgCl<sub>2</sub> to MgBr<sub>2</sub> and NaCl to  
276 NaBr, before mixing the 0.6+0.6 μL drops. Anomalous data were collected at the BioMAX beamline at MAX IV  
277 Laboratory using a wavelength of 0.9203 Å.

## 278 **Data processing**

### 279 ***Outward occluded state***

280 Datasets were processed and scaled using XDS<sup>44</sup> in space group P212121 (#19), which suggested the presence of one  
281 STP10 monomer in the asymmetric unit (~58% solvent content). Molecular replacement was done using Phaser<sup>45</sup>  
282 and the outward open STP10 (PDB: 6H7D) as the search model. Afterwards the model was optimized further by  
283 running phenix.refine<sup>46</sup>. Final refinement in phenix.refine was done with a refinement strategy of individual sites,  
284 individual ADP, and group TLS (3 groups), against a maximum likelihood (ML) target with reflections in the 50-1.8  
285 Å resolution range. The final model yielded a Rwork of 18.74% and Rfree of 21.20% (Extended Data Table 1).  
286 MolProbity<sup>47</sup> evaluation of the Ramachandran plot gave 99.18% in favored regions and 0.0% outliers.

### 287 ***Inward open state***

288 Datasets were processed and scaled using XDS<sup>44</sup> in space group C2221 (#20), which suggested the presence of  
289 one STP10 monomer in the asymmetric unit (~64% solvent content). To solve the phase problem, Molecular  
290 Replacement (MR) was done using Phaser<sup>45</sup> and a search model that contained the transmembrane region of the  
291 N-domain from the previously published STP10 (PDB: 6H7D). The partial solution was then used as input for  
292 a second round of MR, now using the transmembrane region of the C-domain as the search model. Some of the  
293 missing loops were then build manually followed by Molecular Dynamics based geometry optimization using  
294 MDFF<sup>48</sup> through Namdinator<sup>49</sup>. After this, the model could be further improved by iterative manual model building  
295 in COOT<sup>50</sup> combined with Rosetta optimization in phenix.rosetta\_refine<sup>51</sup> and refinement using phenix.refine<sup>46</sup>  
296 guided by 2mFo-DFc maps and Feature Enhanced maps<sup>52</sup> using model phases. Final refinement in phenix.refine was  
297 done with a refinement strategy of individual sites, individual ADP, and group TLS (2 groups), against a maximum  
298 likelihood (ML) target with reflections in the 20-2.64 Å resolution range. The final model yielded a Rwork of  
299 24.66% and Rfree of 27.79% (Extended Data Table 1). MolProbity<sup>47</sup> evaluation of the Ramachandran plot gave  
300 96.27% in favored regions and 0% outliers. Crystals grown with bromide diffracted to 3.2 Å. Data were collected at  
301 the wavelength near the bromine K-absorption edge (0.9203 Å) to maximize the anomalous signal, and processed to  
302 3.5 Å in XDS. The anomalous difference Fourier map was calculated based on data from 18 to 6.5 Å resolution and  
303 model phases. One single strong anomalous peak (8.72 sigma) was identified, confirming the bromide/chloride site.

## 304 **Data analysis**

305 All structural figures were prepared using PyMOL (The PyMOL Molecular Graphics System, Version 1.5.0.4  
306 (Schrodinger LLC, 2012)). Superposition of the two protein structures was carried out by matching graphs built  
307 on the protein's secondary-structure elements, followed by an iterative three-dimensional alignment of protein  
308 backbone C-alpha atoms using superpose<sup>53</sup>. Sequence alignments were constructed with PROMALS3D<sup>54</sup>, followed  
309 by manually refining gaps based on the transmembrane regions observed in the STP10 structure and predicted for  
310 other sequences using Phobius<sup>55</sup>. Alignment was visualized using ALINE<sup>56</sup>. Surface electrostatic potential was  
311 calculated using the APBS Electrostatics<sup>57</sup> plugin with default settings in PyMOL.

## 312 **Yeast uptake assay**

313 For functional characterization, experiments were performed essentially as described by Sauer and Stadler<sup>58</sup>. In brief,  
314 the STP10 gene was subcloned into a p426MET25 vector<sup>59</sup> for constitutive expression and transformed into the *S.*  
315 *cerevisiae* hexose transport deficient strain, EBY-WV4000<sup>60</sup>, using the lithium acetate/PEG method. Transformed  
316 cells were plated in synthetic dropout media with 2% maltose and without uracil. Four to five colonies were used to  
317 inoculate 50 ml of synthetic dropout media with 2% maltose, without uracil and methionine and grown to an optical  
318 density at 600 nm (OD600) of ~1.5. Cells were washed twice with 25 mM NaPO<sub>4</sub> buffer pH 5.0, and resuspended



319 in the same buffer to an OD600 of 10. For each reaction 20  $\mu$ l of cells were mixed with 180  $\mu$ l of 50 mM NaPO<sub>4</sub>  
320 adjusted to pH 5.0. Cells were shaken in a thermomixer at 30 °C and tests were initiated by adding substrate. After  
321 timed incubation, yeast cells were collected via vacuum filtration on mixed cellulose ester filters (0.8  $\mu$ m pore size)  
322 and immediately washed three times with an excess of ice-cold distilled water. Incorporation of radioactivity was  
323 determined by scintillation counting. For all assays 1  $\mu$ Ci [3 H]-D-glucose (PerkinElmer, USA) was used as the  
324 radioactive tracer. For the determination of  $K_m$  values, cells were incubated with [3 H]-D-glucose for 4 min to keep  
325 uptake in the linear range. For the  $K_m$  value determination, the data was normalized to the predicted  $V_{max}$  by fitting  
326 the data to Michaelis-Menten kinetics. The experiments were performed at least in triplicate and showed similar  
327 results. Data was analyzed with GraphPad Prism 8.

## 328 **Molecular dynamics simulations**

### 329 **Model building**

330 All-atom models were built using the outward and inward STP10 structures from this study. Non-protein molecules  
331 were removed except five interacting water molecules within 6 Å of Asp42 and Arg142 in the outward structure  
332 and three water molecules in the inward protein structures (one water molecule within 3 Å of Asp42 and Arg142  
333 and the two other ones buried between Asn188 and Met304 in the transmembrane protein region). Hydrogens were  
334 added to the initial outward and inward structural models and the structures were minimized using Maestro 2019v1  
335 (Schrödinger LLC, 2019)). In addition, *in silico* mutations were performed in the inward protein structure to restore  
336 the wild type sequence.

### 337 **Protonation states assignment**

338 The resulting protein atom coordinates of the model building process were used to estimate the  $pK_a$  values for all  
339 titratable sites using continuum electrostatic calculations following a similar protocol to the H++ server<sup>61</sup>. The sugar  
340 molecules were removed from the models for these calculations, since they are not explicitly modeled. Electrostatic  
341 calculations were performed with the MEAD 2.2.7 package and the internal protein ( $\epsilon_p$ ) and water dielectric constant  
342 ( $\epsilon_w$ ) were set to 6 and 80, respectively<sup>62</sup>. Hydrogen atoms were added and the amber FF14SB electrostatic charges  
343 and mbondi2 radii set were assigned to the protein models using the tLeap program available in AmberTools18<sup>63,64</sup>.  
344  $pK_{1/2}$  values, pH at which a titratable site is 50% ionized, for all titratable sites were calculated using Monte Carlo  
345 (MC) calculations implemented in the MCTI program using 1000 full MC and 10000 reduced MC steps<sup>65</sup>. The  
346 latter is a statistical mechanics approach to account for the interactions of multiple titratable sites in all possible  
347 configurations. We also calculated  $pK_a$  values using the empirical method Propka3.0 as a reference<sup>66</sup>. Results are  
348 reported for residues showing large  $pK_{1/2}$  shifts in Extended Data Fig. S8a,b) for different values of  $\epsilon_p$  ranging from  
349 4, 6 to 10.  $pK_{1/2}$  shifts decrease as the protein dielectric constant increases, which accounts for the solvent screening  
350 effect. Here, we used  $\epsilon_p = 4$  accounting for a relatively stable protein structure embedded in a low dielectric  
351 environment such as the membrane. STP10 functions over a pH range between 5 to 7, to setup the ionization states  
352 in our MD simulations we used a mid pH value of 6. At pH 6, Glu354's  $pK_{1/2}$  was higher than the desired pH as  
353 well as it is partially exposed to the lipid environment. Since our continuum electrostatic calculations do not consider  
354 the low dielectric lipid bilayer, we provide a first-order approximation of the change of  $pK_a$  ( $\Delta pK_a$ ) of charging  
355 Glu354 in the membrane environment. For this we used APBSmem, a software specifically designed to estimate  
356 this additional change of  $pK_a$ , with  $\epsilon_p = 4$  and  $\epsilon_{membrane} = 2$ , and other recommended parameters (see reference  
357 for details)<sup>67</sup>.  $\Delta pK_a$  is estimated around +15 for both STP10 structures, thus resulting on  $pK_{1/2} + \Delta pK_a > 22$  well  
358 above pH 6. Therefore, Glu354 is set to be neutral in both outward and inward structures. Furthermore, predicted  
359 Asp42's  $pK_{1/2}$  values for both STP10 crystal structures are higher than pH 6, and the additional change  $\Delta pK_a$  when  
360 charging Asp42 in the membrane is -0.1 by APBSmem for both protein structures. Thus, our continuum electrostatic  
361 calculations for Asp42 predict  $pK_{1/2}$  of 6.8 and 11 for the outward and inward crystal structures, respectively. Note  
362 that both the predicted  $pK_{1/2}$  difference of Asp42 in the two crystal structures and the buried location of Asp42  
363 inside the protein indicate a possible role of ionization changes of Asp42 in triggering protein conformational  
364 changes. Hence, protonation changes of Asp42 will be studied through extensive MD simulations and free-energy  
365 perturbation calculations as described in the following subsections. Three residues Glu53, Glu54 and Glu64 located

366 in the extracellular loops L1 and L2 have predicted  $pK_{1/2}$  values higher/lower than pH 6, but these residues were set  
367 to their default ionization states because of their solvent exposure and to facilitate comparison between different  
368 MD simulations focused on changes of protonation of Asp42. The protein contains six histidines, which were set to  
369 neutral states (epsilon microstate) for both protein states since they are also exposed to the solvent and to keep the  
370 same ionization configuration in all MD simulations. All other titrable sites were set to their standard states.

### 371 **System preparation**

372 Protein structure orientation in a lipid membrane was estimated with the PPM server<sup>68</sup>. Using the predicted  
373 orientations, protein-membrane systems were built using the CHARMM-GUI Membrane Builder<sup>69,70</sup>. Different  
374 system models for the outward and inward states were built with Asp42 charged or neutral. Terminal chains were  
375 capped using acetyl (ACE) and N-methyl amide (NME) groups. A disulfide bridge was built between Cys77  
376 and Cys449. The protein was inserted in a membrane containing approximately 222 POPC lipids and solvated  
377 by 19000 to 20000 TIP3P waters providing 18 Å separation to the box edges above and below the protein. The  
378 approximate box size for all systems is 96 Å x 96 Å x 110 Å. CHARMM36m force field was used to model the  
379 protein, CHARMM36 for the lipids and for the β-D-glucose substrate<sup>71-73</sup>. The system charge was neutralized by  
380 Cl<sup>-</sup> counterions.

### 381 **Molecular Dynamics simulations protocols:**

382 MD simulations were carried out using the GPU accelerated version of PMEMD18 MD module of the Amber suite  
383 of programs<sup>74,75</sup>. The system was first minimized by 2500 steps of steepest-descent followed by 2500 steps of  
384 conjugate gradient. Positional restraints were placed in all heavy-atoms of the protein and substrate with a force  
385 constant of 100 kcal/(mol Å<sup>2</sup>). The system was then equilibrated by a five-stage equilibration process. The first stage  
386 was an NVT (constant number of particles, volume and temperature ensemble), equilibration with 125 ps and time  
387 step of 1 fs with a force constant of 10 kcal/(mol Å<sup>2</sup>). This was followed by semiisotropic NPT (constant number  
388 of particles, volume and pressure ensemble), equilibration over 250 ps and a force constant of 2.5 kcal/(mol Å<sup>2</sup>).  
389 The third stage had a force constant of 1 kcal/(mol Å<sup>2</sup>) over 500 ps with time step of 2 fs. For the following stages,  
390 the time step was kept at 2 fs. The fourth stage was 500 ps with 0.5 kcal/(mol Å<sup>2</sup>). The final stage was carried out  
391 over 20.5 ns with a weak restraint of 0.1 kcal/(mol Å<sup>2</sup>). For production MD simulations the protein and substrate  
392 heavy-atom restraints were released and approximately 2000 ns were performed for each independent repeat. The  
393 following parameters were set for all MD simulations reported here. Covalent bonds formed by hydrogen atoms  
394 were constrained using the SHAKE algorithm. A nonbonded cutoff of 12 Å was used with a force-based switching  
395 cutoff of 10 Å for the van der Waals interactions. Long range electrostatic interactions were calculated using the  
396 Particle Mesh Ewald. The system was simulated with a semiisotropic NPT conditions on the membrane plane. The  
397 target pressure of 1.0 bar was regulated by a Monte-Carlo barostat and the temperature of 310 K was controlled by a  
398 Langevin thermostat with a friction coefficient of 1 psÅ<sup>-1</sup>. The ig parameter of PMEMD was set to -1 to generate a  
399 random seed for the pseudo-random generators in all reported MD simulations.

### 400 **Free energy perturbation calculations**

The  $pK_a$  of Asp42 was calculated using the following equations:

$$pK_{a,protein} = pK_{a,model} + \frac{1}{2.303KT} \Delta\Delta G \quad (1)$$

$$\Delta\Delta G = \Delta G_{protein} - \Delta G_{model} \quad (2)$$

401 Where  $\Delta\Delta G$  is the difference between the free energy of charging Asp42 in the protein environment embedded in  
402 a solvated lipid bilayer ( $\Delta G_{protein}$ ) and the free energy of charging Asp in a small dipeptide model in water ( $\Delta G_{model}$ ).  
403  $pK_{a,model} = 4$  is the experimentally determined  $pK_a$  of Asp in solution and  $pK_{a, protein}$  is the calculated  $pK_a$  of Asp  
404 in a protein environment.  $K$  is the Boltzmann constant and  $T = 310$  K.

Free energy perturbation (FEP) method<sup>76</sup> was used to calculate  $\Delta G_{protein}$  for Asp42 in both outward and inward STP10 structures and  $\Delta G_{model}$  for Asp in a dipeptide model solvated in explicit water. FEP is a statistical mechanics method that allows for a gradual transformation of the system from an initial state (neutral Asp) to a new one (charged Asp). In FEP calculations a perturbed Hamiltonian  $U(X, \lambda)$  is coupled to a non-physical parameter  $\lambda$  as follows:

$$U(X, \lambda) = (1 - \lambda)U(X)_A + \lambda U(X)_B \quad (3)$$

Where  $U(X)_A$  and  $U(X)_B$  are the Hamiltonians of the initial and final states  $A$  and  $B$  of the system and  $X$  are the atom coordinates. In the case of charging Asp42 we used the following equation to modify the partial charges of the side chain:

$$q(\lambda)_i = (1 - \lambda)q_{A,i} + \lambda q_{B,i} \quad (4)$$

405 Where  $q_i$  is the partial charge of atom  $i$  in the side chain of Asp42 for states  $A$  (neutral Asp) and  $B$  (charged Asp).  
406 To prepare the FEP MD simulations, the protein structures were embedded in a POPC lipid bilayer as described in  
407 the system preparation. A small peptide of sequence ACE-Asp-NME was built to model aspartate in an unfolded  
408 state, it was solvated in a cubic box with a minimum 12 Å distance between the peptide and the simulation  
409 box edges. The partial charges of Asp42's side chain were linearly scaled in 12 states with neutral and charged  
410 Asp42 at the initial and final states, respectively<sup>77</sup>. The topology file for each state was edited using ParmEd  
411 (<http://github.com/ParmEd/ParmEd>). Hamiltonian replica exchange molecular dynamics (HREMD) was used to  
412 improve the convergence of FEP calculations with 500000 exchange trials every 50 MD steps<sup>78</sup>. Note that HREMD  
413 implementation in the GPU version of PMEMD18 only supports NVT MD simulations. This required a distinct  
414 equilibration process such that all stages have the same box dimensions. An intermediate stage near to the midpoint  
415 of the alchemical transformation was first equilibrated using the first four steps of the equilibration protocol described  
416 above. The fifth step was carried out over 3 ns followed by a final equilibration process of 5 ns with no restraints. The  
417 final NPT equilibrated box was replicated in all intermediate stages and further equilibrated using the corresponding  
418 topology file through 5 ns of NVT equilibration with no restraints. FEP calculations were repeated with a neutral  
419 form of Arg142, i.e. set to a tautomer (RN2) of the neutral guanidinium side chain, or without a substrate.

#### 420 **MD analysis**

421 MD simulation trajectories were analyzed using cpptraj 4.14.0 and MDtraj 1.9.3 software packages<sup>79,80</sup>. VMD 1.9.3  
422 program was used to visualize MD trajectories and calculate surface accessible surface area<sup>81</sup>.

## 423 References

- 424 1. Slewinski, T. L. Diverse functional roles of monosaccharide transporters and their homologs in vascular plants:  
425 A physiological perspective. *Mol. Plant* **4**, 641–662, [10.1093/mp/ssr051](https://doi.org/10.1093/mp/ssr051) (2011).
- 426 2. Lemoine, R. *et al.* Source-to-sink transport of sugar and regulation by environmental factors. *Front. Plant Sci.*  
427 **4**, 272, [10.3389/fpls.2013.00272](https://doi.org/10.3389/fpls.2013.00272) (2013).
- 428 3. Rottmann, T., Fritz, C., Sauer, N. & Stadler, R. Glucose Uptake via STP Transporters Inhibits in Vitro Pollen  
429 Tube Growth in a HEXOKINASE1-Dependent Manner in *Arabidopsis thaliana*. *The Plant Cell* **30**, 2057–2081,  
430 [10.1105/tpc.18.00356](https://doi.org/10.1105/tpc.18.00356) (2018).
- 431 4. Cheng, J. *et al.* Down-Regulating CsHT1, a Cucumber Pollen-Specific Hexose Transporter, Inhibits Pollen  
432 Germination, Tube Growth, and Seed Development. *Plant Physiol.* **168**, 635, [10.1104/pp.15.00290](https://doi.org/10.1104/pp.15.00290) (2015).
- 433 5. Flütsch, S. *et al.* Glucose uptake to guard cells via STP transporters provides carbon sources for stomatal  
434 opening and plant growth. *EMBO reports* **n/a**, e49719, [10.15252/embr.201949719](https://doi.org/10.15252/embr.201949719) (2020).
- 435 6. Nørholm, M. H. H., Nour-Eldin, H. H., Brodersen, P., Mundy, J. & Halkier, B. A. Expression of the *Arabidopsis*  
436 high-affinity hexose transporter STP13 correlates with programmed cell death. *FEBS Lett.* **580**, 2381–2387,  
437 [10.1016/j.febslet.2006.03.064](https://doi.org/10.1016/j.febslet.2006.03.064) (2006).
- 438 7. Poschet, G., Hannich, B. & Büttner, M. Identification and characterization of AtSTP14, a novel galactose  
439 transporter from *Arabidopsis*. *Plant & Cell Physiol.* **51**, 1571–1580, [10.1093/pcp/pcq100](https://doi.org/10.1093/pcp/pcq100) (2010).
- 440 8. Rottmann, T. *et al.* Sugar Transporter STP7 Specificity for l-Arabinose and d-Xylose Contrasts with the Typical  
441 Hexose Transporters STP8 and STP12. *Plant Physiol.* **176**, 2330–2350, [10.1104/pp.17.01493](https://doi.org/10.1104/pp.17.01493) (2018).
- 442 9. Büttner, M. The monosaccharide transporter(-like) gene family in *Arabidopsis*. *FEBS Lett.* **581**, 2318–2324,  
443 [10.1016/j.febslet.2007.03.016](https://doi.org/10.1016/j.febslet.2007.03.016) (2007).
- 444 10. Morkunas, I. & Ratajczak, L. The role of sugar signaling in plant defense responses against fungal pathogens.  
445 *Acta Physiol. Plantarum* **36**, 1607–1619, [10.1007/s11738-014-1559-z](https://doi.org/10.1007/s11738-014-1559-z) (2014).
- 446 11. Yamada, K. *et al.* Monosaccharide absorption activity of *Arabidopsis* roots depends on expression profiles of  
447 transporter genes under high salinity conditions. *The J. Biol. Chem.* **286**, 43577–43586, [10.1074/jbc.M111.](https://doi.org/10.1074/jbc.M111.269712)  
448 [269712](https://doi.org/10.1074/jbc.M111.269712) (2011).
- 449 12. Moore, J. W. *et al.* A recently evolved hexose transporter variant confers resistance to multiple pathogens in  
450 wheat. *Nat. Genet.* **47**, 1494–1498, [10.1038/ng.3439](https://doi.org/10.1038/ng.3439) (2015).
- 451 13. Doidy, J. *et al.* Sugar transporters in plants and in their interactions with fungi. *Trends Plant Sci.* **17**, 413–422,  
452 [10.1016/j.tplants.2012.03.009](https://doi.org/10.1016/j.tplants.2012.03.009) (2012).
- 453 14. Lemonnier, P. *et al.* Expression of *Arabidopsis* sugar transport protein STP13 differentially affects glucose trans-  
454 port activity and basal resistance to *Botrytis cinerea*. *Plant Mol. Biol.* **85**, 473–484, [10.1007/s11103-014-0198-5](https://doi.org/10.1007/s11103-014-0198-5)  
455 (2014).
- 456 15. Yamada, K., Saijo, Y., Nakagami, H. & Takano, Y. Regulation of sugar transporter activity for antibacterial  
457 defense in *Arabidopsis*. *Science* **354**, 1427–1430, [10.1126/science.aah5692](https://doi.org/10.1126/science.aah5692) (2016).
- 458 16. Sutton, P. N., Gilbert, M. J., Williams, L. E. & Hall, J. L. Powdery mildew infection of wheat leaves changes host  
459 solute transport and invertase activity. *Physiol. Plantarum* **129**, 787–795, [10.1111/j.1399-3054.2007.00863.x](https://doi.org/10.1111/j.1399-3054.2007.00863.x)  
460 (2007).
- 461 17. Geilfus, C.-M. The pH of the Apoplast: Dynamic Factor with Functional Impact Under Stress. *Mol. Plant* **10**,  
462 1371–1386, [10.1016/j.molp.2017.09.018](https://doi.org/10.1016/j.molp.2017.09.018) (2017).
- 463 18. Harrison, M. J. Biotrophic interfaces and nutrient transport in plant/fungal symbioses. *J. Exp. Bot.* **50**,  
464 1013–1022, [10.1093/jxb/50.Special\\_Issue.1013](https://doi.org/10.1093/jxb/50.Special_Issue.1013) (1999).



- 465 **19.** Voegelé, R. & Mendgen, K. Nutrient uptake in rust fungi: how sweet is parasitic life. *Euphytica: Neth. J. Plant*  
466 *Breed.* **179**, 41–55, [10.1007/s10681-011-0358-5](https://doi.org/10.1007/s10681-011-0358-5) (2011).
- 467 **20.** Milne, R. J. *et al.* The wheat LR67 gene from the sugar transport protein 13 family confers multipathogen  
468 resistance in barley. *Plant Physiol.* **179**, 1285–1297, [10.1104/pp.18.00945](https://doi.org/10.1104/pp.18.00945) (2019).
- 469 **21.** Büttner, M. The Arabidopsis sugar transporter (AtSTP) family: an update: Arabidopsis sugar transporter family.  
470 *Plant Biol.* **12**, 35–41, [10.1111/j.1438-8677.2010.00383.x](https://doi.org/10.1111/j.1438-8677.2010.00383.x) (2010).
- 471 **22.** Niño-González, M., Novo-Uzal, E., Richardson, D. N., Barros, P. M. & Duque, P. More Transporters,  
472 More Substrates: The Arabidopsis Major Facilitator Superfamily Revisited. *Mol. Plant* **12**, 1182–1202,  
473 [10.1016/j.molp.2019.07.003](https://doi.org/10.1016/j.molp.2019.07.003) (2019).
- 474 **23.** Sun, L. *et al.* Crystal structure of a bacterial homologue of glucose transporters GLUT1-4. *Nature* **490**, 361–366,  
475 [10.1038/nature11524](https://doi.org/10.1038/nature11524) (2012).
- 476 **24.** Iancu, C. V., Zamoan, J., Woo, S. B., Aleshin, A. & Choe, J.-y. Crystal structure of a glucose/H<sup>+</sup> symporter and  
477 its mechanism of action. *Proc. Natl. Acad. Sci.* **110**, 17862–17867, [10.1073/pnas.1311485110](https://doi.org/10.1073/pnas.1311485110) (2013).
- 478 **25.** Rottmann, T., Zierer, W., Subert, C., Sauer, N. & Stadler, R. STP10 encodes a high-affinity monosaccharide  
479 transporter and is induced under low-glucose conditions in pollen tubes of Arabidopsis. *J. Exp. Bot.* **67**,  
480 2387–2399, [10.1093/jxb/erw048](https://doi.org/10.1093/jxb/erw048) (2016).
- 481 **26.** Paulsen, P. A., Custódio, T. F. & Pedersen, B. P. Crystal structure of the plant symporter STP10 illuminates sugar  
482 uptake mechanism in monosaccharide transporter superfamily. *Nat. Commun.* **10**, [10.1038/s41467-018-08176-9](https://doi.org/10.1038/s41467-018-08176-9)  
483 (2019).
- 484 **27.** Pao, S. S., Paulsen, I. T. & Saier, M. H. Major facilitator superfamily. *Microbiol. molecular biology reviews* :  
485 *MMBR* **62**, 1–34 (1998).
- 486 **28.** Seyfang, A. & Landfear, S. M. Four Conserved Cytoplasmic Sequence Motifs Are Important for Transport  
487 Function of the Leishmania Inositol/H<sup>+</sup> Symporter. *J. Biol. Chem.* **275**, 5687–5693, [10.1074/jbc.275.8.5687](https://doi.org/10.1074/jbc.275.8.5687)  
488 (2000).
- 489 **29.** Jiang, D. *et al.* Structure of the YajR transporter suggests a transport mechanism based on the conserved motif  
490 A. *Proc. Natl. Acad. Sci.* **110**, 14664–14669, [10.1073/pnas.1308127110](https://doi.org/10.1073/pnas.1308127110) (2013).
- 491 **30.** Doki, S. *et al.* Structural basis for dynamic mechanism of proton-coupled symport by the peptide transporter  
492 POT. *Proc. Natl. Acad. Sci.* **110**, 11343–11348, [10.1073/pnas.1301079110](https://doi.org/10.1073/pnas.1301079110) (2013).
- 493 **31.** Masureel, M. *et al.* Protonation drives the conformational switch in the multidrug transporter LmrP. *Nat.*  
494 *chemical biology* **10**, 149–155, [10.1038/nchembio.1408](https://doi.org/10.1038/nchembio.1408) (2014).
- 495 **32.** Wisedchaisri, G., Park, M.-S., Iadanza, M. G., Zheng, H. & Gonen, T. Proton-coupled sugar transport in the  
496 prototypical major facilitator superfamily protein XyleE. *Nat. Commun.* **5**, 1–11, [10.1038/ncomms5521](https://doi.org/10.1038/ncomms5521) (2014).
- 497 **33.** Nomura, N. *et al.* Structure and mechanism of the mammalian fructose transporter GLUT5. *Nature* **526**,  
498 397–401, [10.1038/nature14909](https://doi.org/10.1038/nature14909) (2015).
- 499 **34.** Ke, M., Yuan, Y., Jiang, X., Yan, N. & Gong, H. Molecular determinants for the thermodynamic and functional  
500 divergence of uniporter GLUT1 and proton symporter XyleE. *PLoS Comput. Biol.* **13**, [10.1371/journal.pcbi.](https://doi.org/10.1371/journal.pcbi.1005603)  
501 [1005603](https://doi.org/10.1371/journal.pcbi.1005603) (2017).
- 502 **35.** Martens, C. *et al.* Direct protein-lipid interactions shape the conformational landscape of secondary transporters.  
503 *Nat. Commun.* **9**, 1–12, [10.1038/s41467-018-06704-1](https://doi.org/10.1038/s41467-018-06704-1) (2018).
- 504 **36.** Buch-Pedersen, M. J., Pedersen, B. P., Veierskov, B., Nissen, P. & Palmgren, M. G. Protons and how they  
505 are transported by proton pumps. *Pflügers Arch. Eur. J. Physiol.* **457**, 573–579, [10.1007/s00424-008-0503-8](https://doi.org/10.1007/s00424-008-0503-8)  
506 (2009).
- 507 **37.** Martens, C. *et al.* Lipids modulate the conformational dynamics of a secondary multidrug transporter. *Nat.*  
508 *Struct. Mol. Biol.* **23**, 744–751, [10.1038/nsmb.3262](https://doi.org/10.1038/nsmb.3262) (2016).

- 509 **38.** Couturier, J., Chibani, K., Jacquot, J.-P. & Rouhier, N. Cysteine-based redox regulation and signaling in plants.  
510 *Front. Plant Sci.* **4**, [10.3389/fpls.2013.00105](https://doi.org/10.3389/fpls.2013.00105) (2013).
- 511 **39.** Skryhan, K. *et al.* The Role of Cysteine Residues in Redox Regulation and Protein Stability of Arabidopsis  
512 thaliana Starch Synthase 1. *PLOS ONE* **10**, e0136997, [10.1371/journal.pone.0136997](https://doi.org/10.1371/journal.pone.0136997) (2015).
- 513 **40.** Kiyosue, T., Yamaguchi-Shinozaki, K. & Shinozaki, K. Cloning of cDNAs for genes that are early-responsive  
514 to dehydration stress (ERDs) in Arabidopsis thaliana L.: identification of three ERDs as HSP cognate genes.  
515 *Plant Mol. Biol.* **25**, 791–798, [10.1007/BF00028874](https://doi.org/10.1007/BF00028874) (1994).
- 516 **41.** Strobl, S. M., Kischka, D., Heilmann, I., Mouille, G. & Schneider, S. The Tonoplastic Inositol Transporter  
517 INT1 From Arabidopsis thaliana Impacts Cell Elongation in a Sucrose-Dependent Way. *Front. Plant Sci.* **9**,  
518 [10.3389/fpls.2018.01657](https://doi.org/10.3389/fpls.2018.01657) (2018).
- 519 **42.** Lyons, J., Shahsavari, A., Paulsen, P., Pedersen, B. & Nissen, P. Expression strategies for structural studies of  
520 eukaryotic membrane proteins. *Curr. Opin. Struct. Biol.* **38**, 137–144, [10.1016/j.sbi.2016.06.011](https://doi.org/10.1016/j.sbi.2016.06.011) (2016).
- 521 **43.** Tomasiak, T. M. *et al.* General qPCR and Plate Reader Methods for Rapid Optimization of Membrane  
522 Protein Purification and Crystallization Using Thermostability Assays. *Curr. protocols protein science* **77**,  
523 29.11.1–29.11.14, [10.1002/0471140864.ps2911s77](https://doi.org/10.1002/0471140864.ps2911s77) (2014).
- 524 **44.** Kabsch, W. XDS. *Acta Crystallogr. Sect. D: Biol. Crystallogr.* **66**, 125–132, [10.1107/S0907444909047337](https://doi.org/10.1107/S0907444909047337)  
525 (2010).
- 526 **45.** McCoy, A. J. *et al.* Phaser crystallographic software. *J. Appl. Crystallogr.* **40**, 658–674, [10.1107/  
527 S0021889807021206](https://doi.org/10.1107/S0021889807021206) (2007).
- 528 **46.** Adams, P. D. *et al.* PHENIX: a comprehensive Python-based system for macromolecular structure solution.  
529 *Acta Crystallogr. Sect. D: Biol. Crystallogr.* **66**, 213–221, [10.1107/S0907444909052925](https://doi.org/10.1107/S0907444909052925) (2010).
- 530 **47.** Chen, V. B. *et al.* MolProbity: all-atom structure validation for macromolecular crystallography. *Acta*  
531 *Crystallogr. Sect. D, Biol. Crystallogr.* **66**, 12–21, [10.1107/S0907444909042073](https://doi.org/10.1107/S0907444909042073) (2010).
- 532 **48.** Trabuco, L. G., Villa, E., Mitra, K., Frank, J. & Schulten, K. Flexible fitting of atomic structures into electron  
533 microscopy maps using molecular dynamics. *Structure* **16**, 673–683, [10.1016/j.str.2008.03.005](https://doi.org/10.1016/j.str.2008.03.005) (2008).
- 534 **49.** Kidmose, R. T. *et al.* Namdinator - automatic molecular dynamics flexible fitting of structural models into  
535 cryo-EM and crystallography experimental maps. *IUCrJ* **6**, 526–531, [10.1107/S2052252519007619](https://doi.org/10.1107/S2052252519007619) (2019).
- 536 **50.** Emsley, P., Lohkamp, B., Scott, W. G. & Cowtan, K. Features and development of Coot. *Acta Crystallogr. Sect.*  
537 *D, Biol. Crystallogr.* **66**, 486–501, [10.1107/S0907444910007493](https://doi.org/10.1107/S0907444910007493) (2010).
- 538 **51.** DiMaio, F. *et al.* Improved low-resolution crystallographic refinement with Phenix and Rosetta. *Nat. Methods*  
539 **10**, 1102–1104, [10.1038/nmeth.2648](https://doi.org/10.1038/nmeth.2648) (2013).
- 540 **52.** Afonine, P. V. *et al.* FEM: feature-enhanced map. *Acta Crystallogr. Sect. D, Biol. Crystallogr.* **71**, 646–666,  
541 [10.1107/S1399004714028132](https://doi.org/10.1107/S1399004714028132) (2015).
- 542 **53.** Krissinel, E. & Henrick, K. Secondary-structure matching (SSM), a new tool for fast protein structure alignment  
543 in three dimensions. *Acta Crystallogr. Sect. D, Biol. Crystallogr.* **60**, 2256–2268, [10.1107/S0907444904026460](https://doi.org/10.1107/S0907444904026460)  
544 (2004).
- 545 **54.** Pei, J., Kim, B.-H. & Grishin, N. V. PROMALS3D: a tool for multiple protein sequence and structure alignments.  
546 *Nucleic Acids Res.* **36**, 2295–2300, [10.1093/nar/gkn072](https://doi.org/10.1093/nar/gkn072) (2008).
- 547 **55.** Käll, L., Krogh, A. & Sonnhammer, E. L. L. A combined transmembrane topology and signal peptide prediction  
548 method. *J. Mol. Biol.* **338**, 1027–1036, [10.1016/j.jmb.2004.03.016](https://doi.org/10.1016/j.jmb.2004.03.016) (2004).
- 549 **56.** Bond, C. S. & Schüttelkopf, A. W. ALINE: a WYSIWYG protein-sequence alignment editor for publication-  
550 quality alignments. *Acta Crystallogr. Sect. D, Biol. Crystallogr.* **65**, 510–512, [10.1107/S0907444909007835](https://doi.org/10.1107/S0907444909007835)  
551 (2009).

- 552 **57.** Baker, N. A., Sept, D., Joseph, S., Holst, M. J. & McCammon, J. A. Electrostatics of nanosystems: Application  
553 to microtubules and the ribosome. *Proc. Natl. Acad. Sci.* **98**, 10037–10041, [10.1073/pnas.181342398](https://doi.org/10.1073/pnas.181342398) (2001).
- 554 **58.** Sauer, N. & Stadler, R. A sink-specific H<sup>+</sup>/monosaccharide co-transporter from *Nicotiana tabacum*: cloning  
555 and heterologous expression in baker's yeast. *The Plant J.* **4**, 601–610, [10.1046/j.1365-313x.1993.04040601.x](https://doi.org/10.1046/j.1365-313x.1993.04040601.x)  
556 (1993).
- 557 **59.** Mumberg, D., Müller, R. & Funk, M. Regulatable promoters of *Saccharomyces cerevisiae*: comparison  
558 of transcriptional activity and their use for heterologous expression. *Nucleic Acids Res.* **22**, 5767–5768,  
559 [10.1093/nar/22.25.5767](https://doi.org/10.1093/nar/22.25.5767) (1994).
- 560 **60.** Wiczorke, R. *et al.* Concurrent knock-out of at least 20 transporter genes is required to block uptake of hexoses  
561 in *Saccharomyces cerevisiae*. *FEBS Lett.* **464**, 123–128, [10.1016/S0014-5793\(99\)01698-1](https://doi.org/10.1016/S0014-5793(99)01698-1) (1999).
- 562 **61.** Anandkrishnan, R., Aguilar, B. & Onufriev, A. V. H<sup>++</sup> 3.0: automating pK prediction and the preparation of  
563 biomolecular structures for atomistic molecular modeling and simulations. *Nucleic Acids Res.* **40**, W537–W541,  
564 [10.1093/nar/gks375](https://doi.org/10.1093/nar/gks375) (2012).
- 565 **62.** Bashford, D. & Gerwert, K. Electrostatic calculations of the pK<sub>a</sub> values of ionizable groups in bacteriorhodopsin.  
566 *J. Mol. Biol.* **224**, 473–486, [10.1016/0022-2836\(92\)91009-e](https://doi.org/10.1016/0022-2836(92)91009-e) (1992).
- 567 **63.** Maier, J. A. *et al.* ff14SB: Improving the Accuracy of Protein Side Chain and Backbone Parameters from  
568 ff99SB. *J. Chem. Theory Comput.* **11**, 3696–3713, [10.1021/acs.jctc.5b00255](https://doi.org/10.1021/acs.jctc.5b00255) (2015).
- 569 **64.** Case, D. A. *et al.* The Amber biomolecular simulation programs. *J. Comput. Chem.* **26**, 1668–1688, [10.1002/  
570 jcc.20290](https://doi.org/10.1002/jcc.20290) (2005).
- 571 **65.** Beroza, P., Fredkin, D. R., Okamura, M. Y. & Feher, G. Protonation of interacting residues in a protein  
572 by a Monte Carlo method: application to lysozyme and the photosynthetic reaction center of *Rhodobacter*  
573 *sphaeroides*. *Proc. Natl. Acad. Sci.* **88**, 5804–5808 (1991).
- 574 **66.** Olsson, M. H. M., Søndergaard, C. R., Rostkowski, M. & Jensen, J. H. PROPKA3: Consistent Treatment of  
575 Internal and Surface Residues in Empirical pK<sub>a</sub> Predictions. *J. Chem. Theory Comput.* **7**, 525–537, [10.1021/  
576 ct100578z](https://doi.org/10.1021/ct100578z) (2011).
- 577 **67.** Marcoline, F., Bethel, N., Guerriero, C., Brodsky, J. & Grabe, M. Membrane Protein Properties Revealed  
578 through Data-Rich Electrostatics Calculations. *Structure* **23**, 1526–1537, [10.1016/j.str.2015.05.014](https://doi.org/10.1016/j.str.2015.05.014) (2015).
- 579 **68.** Lomize, M. A., Pogozheva, I. D., Joo, H., Mosberg, H. I. & Lomize, A. L. OPM database and PPM web server:  
580 resources for positioning of proteins in membranes. *Nucleic Acids Res.* **40**, D370–376, [10.1093/nar/gkr703](https://doi.org/10.1093/nar/gkr703)  
581 (2012).
- 582 **69.** Jo, S., Lim, J. B., Klauda, J. B. & Im, W. CHARMM-GUI Membrane Builder for Mixed Bilayers and Its  
583 Application to Yeast Membranes. *Biophys. J.* **97**, 50–58, [10.1016/j.bpj.2009.04.013](https://doi.org/10.1016/j.bpj.2009.04.013) (2009).
- 584 **70.** Wu, E. L. *et al.* CHARMM-GUI Membrane Builder Toward Realistic Biological Membrane Simulations. *J.*  
585 *computational chemistry* **35**, 1997–2004, [10.1002/jcc.23702](https://doi.org/10.1002/jcc.23702) (2014).
- 586 **71.** Huang, J. *et al.* CHARMM36m: an improved force field for folded and intrinsically disordered proteins. *Nat.*  
587 *Methods* **14**, 71–73, [10.1038/nmeth.4067](https://doi.org/10.1038/nmeth.4067) (2017).
- 588 **72.** Klauda, J. B. *et al.* Update of the CHARMM all-atom additive force field for lipids: Validation on six lipid  
589 types. *The journal physical chemistry. B* **114**, 7830–7843, [10.1021/jp101759q](https://doi.org/10.1021/jp101759q) (2010).
- 590 **73.** Guvench, O. *et al.* Additive empirical force field for hexopyranose monosaccharides. *J. Comput. Chem.* **29**,  
591 2543–2564, [10.1002/jcc.21004](https://doi.org/10.1002/jcc.21004) (2008).
- 592 **74.** Salomon-Ferrer, R., Götz, A. W., Poole, D., Le Grand, S. & Walker, R. C. Routine Microsecond Molecular  
593 Dynamics Simulations with AMBER on GPUs. 2. Explicit Solvent Particle Mesh Ewald. *J. Chem. Theory*  
594 *Comput.* **9**, 3878–3888, [10.1021/ct400314y](https://doi.org/10.1021/ct400314y) (2013).

- 595 **75.** Le Grand, S., Götz, A. W. & Walker, R. C. SPFP: Speed without compromise—A mixed precision model for  
596 GPU accelerated molecular dynamics simulations. *Comput. Phys. Commun.* **184**, 374–380, [10.1016/j.cpc.2012.](https://doi.org/10.1016/j.cpc.2012.09.022)  
597 [09.022](https://doi.org/10.1016/j.cpc.2012.09.022) (2013).
- 598 **76.** Zwanzig, R. W. High-Temperature Equation of State by a Perturbation Method. I. Nonpolar Gases. *The J.*  
599 *Chem. Phys.* **22**, 1420–1426, [10.1063/1.1740409](https://doi.org/10.1063/1.1740409) (1954).
- 600 **77.** Simonson, T., Carlsson, J. & Case, D. A. Proton Binding to Proteins: pKa Calculations with Explicit and  
601 Implicit Solvent Models. *J. Am. Chem. Soc.* **126**, 4167–4180, [10.1021/ja039788m](https://doi.org/10.1021/ja039788m) (2004).
- 602 **78.** Meng, Y., Dashti, D. S. & Roitberg, A. E. Computing Alchemical Free Energy Differences with Hamiltonian  
603 Replica Exchange Molecular Dynamics (H-REMD) Simulations. *J. chemical theory computation* **7**, 2721–2727,  
604 [10.1021/ct200153u](https://doi.org/10.1021/ct200153u) (2011).
- 605 **79.** Roe, D. R. & Cheatham, T. E. PTRAJ and CPPTRAJ: Software for Processing and Analysis of Molecular  
606 Dynamics Trajectory Data. *J. Chem. Theory Comput.* **9**, 3084–3095, [10.1021/ct400341p](https://doi.org/10.1021/ct400341p) (2013).
- 607 **80.** McGibbon, R. T. *et al.* MDTraj: A Modern Open Library for the Analysis of Molecular Dynamics Trajectories.  
608 *Biophys. J.* **109**, 1528–1532, [10.1016/j.bpj.2015.08.015](https://doi.org/10.1016/j.bpj.2015.08.015) (2015).
- 609 **81.** Humphrey, W., Dalke, A. & Schulten, K. VMD: Visual molecular dynamics. *J. Mol. Graph.* **14**, 33–38,  
610 [10.1016/0263-7855\(96\)00018-5](https://doi.org/10.1016/0263-7855(96)00018-5) (1996).



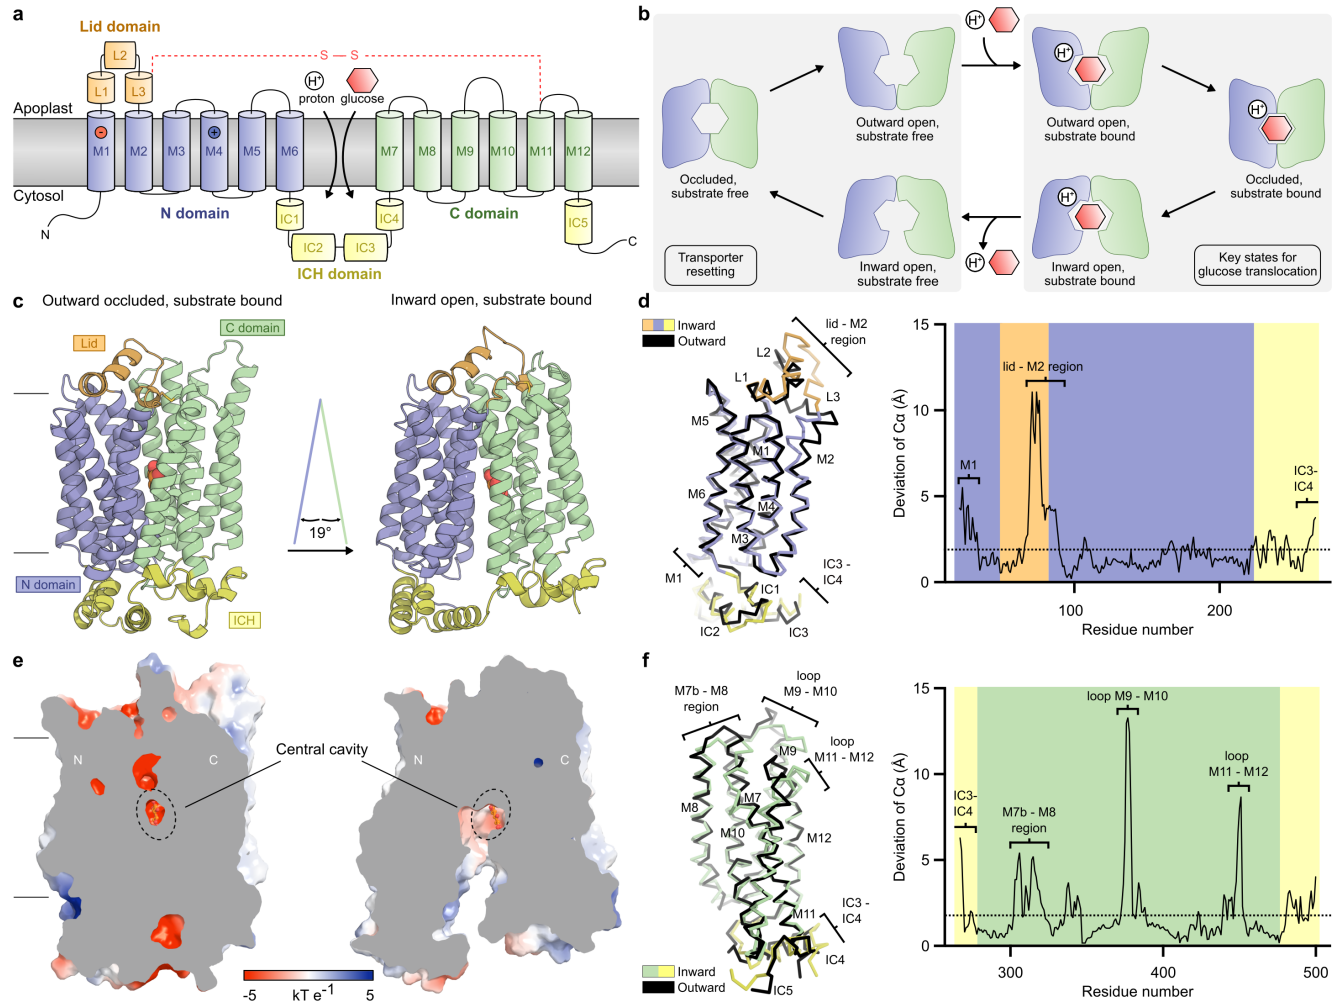

**Fig. 1 | Structures of STP10 in the outward occluded conformation and the inward open conformation.**

**a)** A simplified diagram of the STP10 topology. Substrate (glucose and proton), the disulfide bridge and position of the proton donor/acceptor pair (M1 and M4) are mapped.

**b)** A schematic illustration of the STP10 transport mechanism. Each transport cycle involves binding of substrate in the outward open state and shuttling through a intermediate occluded state to the cytoplasmic side where substrate is released from the inward open state. Returning to a outward open state through a occluded state completes the cycle.

**c)** The two solved conformations of STP10 are distinguished by a 19° opening between the N domain (blue) and C domain (green). Glucose (spheres) is buried at the interface between the transmembrane domains above the ICH domain (yellow). Lid domain (orange) is connected to the C domain by a disulfide bridge (sticks).

**d)** Left: Superposition of the two conformations using C $\alpha$  backbone of N domain residues (21-224 (blue)) including Lid domain (53-80 (orange)) and IC1-3 residues (225-266 (yellow)). Right: Corresponding plot of deviation of the C $\alpha$  positions. Significant local conformational changes (>4.0 Å r.m.s.d) between the two structures are observed in M1, lid-M2 region as well as in the IC3-IC4 region as indicated with brackets. Overall r.m.s.d. of the C $\alpha$  atoms for the N domain half is 1.93 Å (dotted line).

**e)** A slab through the surface electrostatic potential of the STP10 structures. In the outward occluded structure, the glucose is occluded from the intracellular and extracellular side, whereas the glucose is solvent-accessible from the intracellular side in the inward open structure.

**f)** Left: Superposition of the two conformations using C $\alpha$  backbone of C domain residues (267-500 (green)) including IC4 residues (267-281 (yellow)) and IC5 residues (476-500 (yellow)). Right: Corresponding plot of deviation of the C $\alpha$  positions. Significant local conformational changes (>4.0 Å r.m.s.d) between the two structures are observed in IC3-IC4 region, M7b-M8, M9-M10 loop and M11-M12 loop as indicated with brackets. Overall r.m.s.d. of the C $\alpha$  atoms for the C domain half is 1.83 Å (dotted line).

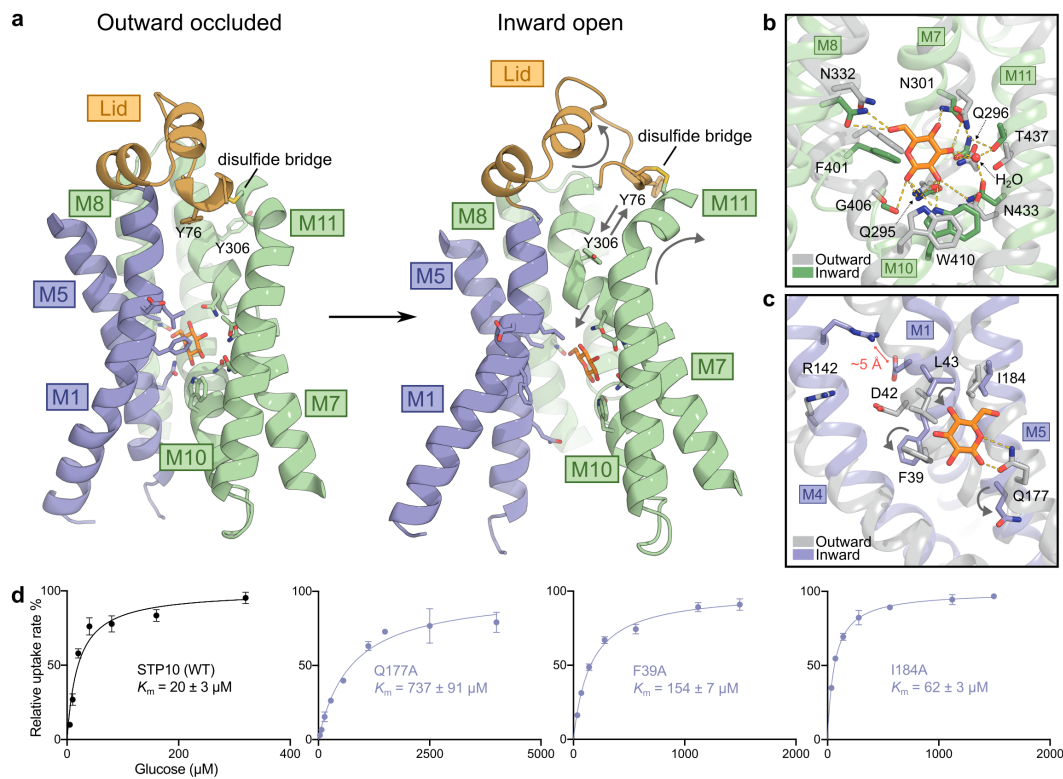

**Fig. 2 | Structures of STP10 with bound glucose and uptake.**

**a)** Structural changes of the central cavity following outward occluded to inward open transition. The central binding site of STP10 is lined by conserved residues from M1 and M5 of the N domain and M7, M8, M10 and M11 from the C domain. Arrows indicate major changes.

**b)** The glucose binding site towards the C domain in the inward (green) and the outward (grey) structure superposed on glucose. Yellow dashes indicate hydrogen bonds.

**c)** The binding site towards the N domain and the proton donor/acceptor pair in inward (blue) and outward (grey) structure superposed on glucose. Grey arrows indicate major changes.

**d)** Michaelis-Menten analysis of glucose uptake of WT and N domain mutants Q177A, F39A and I184A. Data represents mean  $\pm$ SD of three or more replicate experiments.

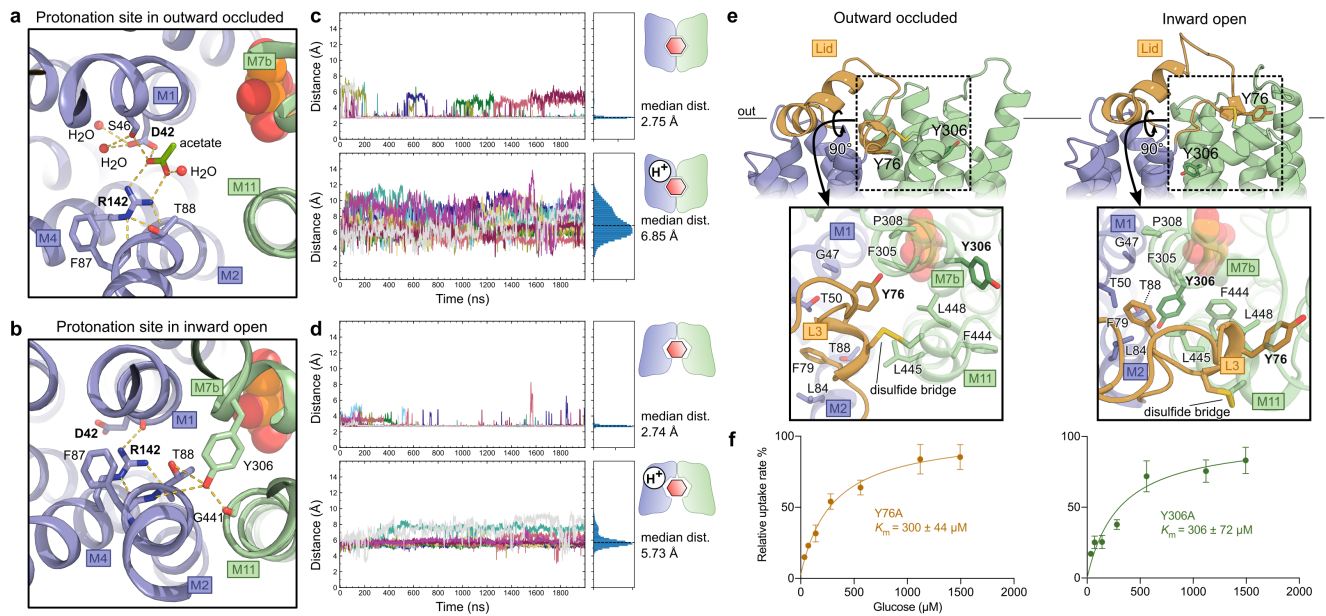

**Fig. 3 | Molecular dynamics simulations of the protonation site and exofacial gating of STP10 states.**

- a)** The proton-binding site in the outward-facing STP10 structure. Yellow dashes indicate hydrogen bonds ( $<3.5 \text{ \AA}$ ).
- b)** The proton-binding site in the inward-facing STP10 structure. Yellow dashes indicate hydrogen bonds ( $<3.5 \text{ \AA}$ ).
- c)** Distance measurements between Asp42 and Arg142 of the outward-facing state throughout 2  $\mu\text{s}$  MD simulations measured in ten independent repeats, shown in different trace colors. The simulations were carried out for the outward-facing state of STP10 with Asp42 either charged (top panel) or neutral (bottom panel). The median distance between Asp42-Arg142 in the charged state was calculated to be 2.76  $\text{\AA}$  while being 6.85  $\text{\AA}$  in the neutral state. The distance range for the top panel is [2.46  $\text{\AA}$ , 8.95  $\text{\AA}$ ] and [2.59  $\text{\AA}$ , 14.92  $\text{\AA}$ ] for the bottom panel. All distance traces correspond to the minimum distance between the oxygen atoms of the carboxyl group of Asp42 and the nitrogen atoms of the guanidine group of Arg142.
- d)** Distance measurements between Asp42 and Arg142 of the inward-facing state throughout 2  $\mu\text{s}$  MD simulations measured in ten independent repeats. The simulations were carried out for the inward-facing state of STP10 with Asp42 either charged (top panel) or neutral (bottom panel). The median distance between Asp42-Arg142 in the charged state was calculated to be 2.74  $\text{\AA}$  while being 5.71  $\text{\AA}$  in the neutral state. The distance range for the top panel is [2.45  $\text{\AA}$ , 9.53  $\text{\AA}$ ] and [2.62  $\text{\AA}$ , 10.92  $\text{\AA}$ ] for the bottom panel.
- e)** Close-up views of hydrophobic interactions that enclose the central cavity from the extracellular side in the outward occluded (left) and the inward open (right) structures.
- f)** Michaelis-Menten analysis of glucose uptake of Y76A and Y306A. Data represents mean  $\pm$ SD of three or more replicate experiments.

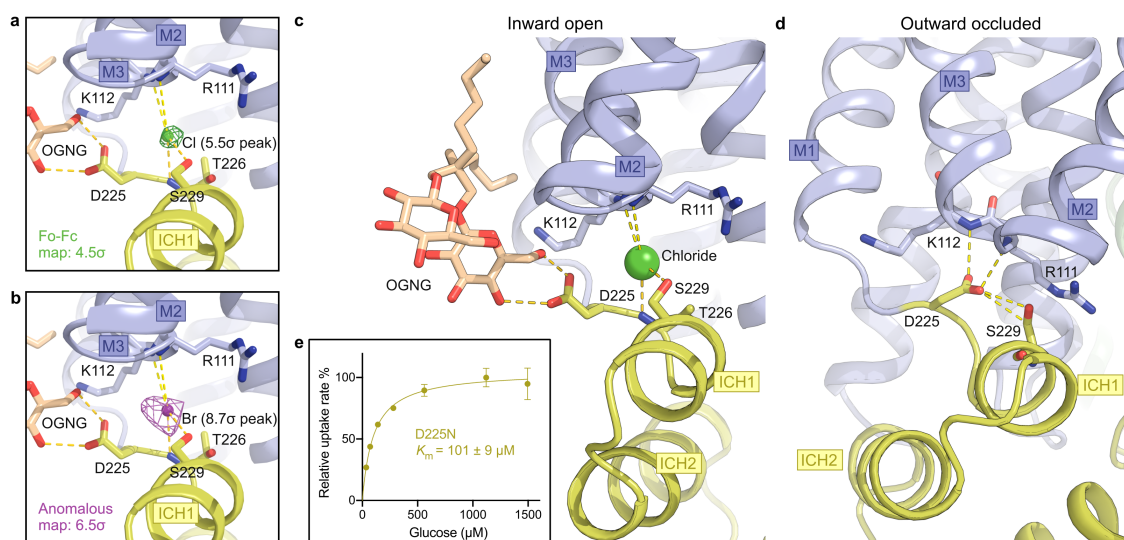

**Fig. 4 | Intracellular molecules target an endofacial regulation site to stabilize the inward-open conformation.**

**a)** The omit Fo-Fc electron density for the positive density peak contoured in green mesh at 4.5 sigma in the inward-open conformation that was identified as a chloride ion.

**b)** The anomalous signal for bromide, shown in magenta mesh contoured at 6.5 sigma. **c)** Intracellular detergent (OGNG) is coordinated to Asp225 in the inward-open conformation. A chloride ion (shown as sphere) neutralizes the A-motif. Selected residues are shown as sticks and hydrogen bonds are represented by yellow dashes ( $<3.5 \text{ \AA}$ ).

**d)** N domain SP-A network in the outward-occluded conformation. Selected residues are shown as sticks and hydrogen bonds are represented by yellow dashes ( $<3.5 \text{ \AA}$ ).

**e)** Michaelis-Menten fit to glucose titration of the D225N at pH 5.0. Data represents mean  $\pm$  SD of three or more replicate experiments.



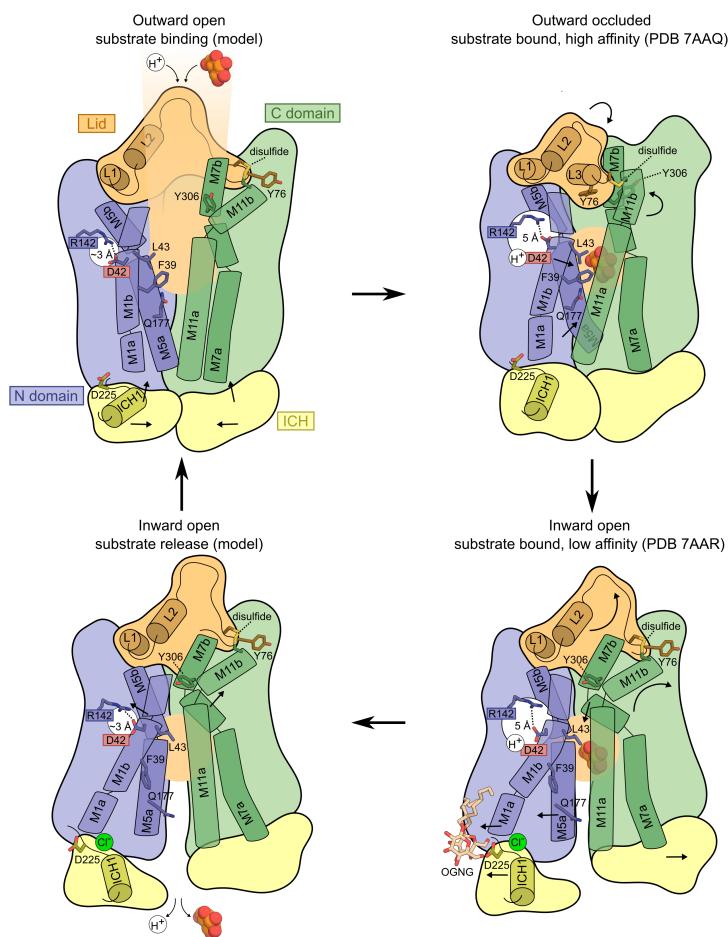

**Fig. 5 | Proposed mechanism of high affinity transport of glucose by STP10.**

In the outward open conformation (top; left), protons and substrate enter the central binding site. Protonation of Asp42 pushes the flexible M1b towards the sugar binding site, creating a high affinity state that results in enclosure of the Lid domain mediated by M11 movements through the disulfide bridge. The Tyr76 residue of the Lid domain ensures that protective enclosure is retained (top; right). A transition to the inward open state results in an opening of the Lid domain bridged to movements of the M11 kink (bottom; right). M7b moves into the central cavity where Tyr306 has switched position with Tyr76 to retain the exofacial gate. Local movements in M1 and M5 result in displacement of substrate binding residues and lower sugar affinity. Following the transition, the N domain SP motif aspartate flips away from the A motif, replaced by a chloride ion. The lowered affinity and flexibility of M1 (due to neutral Asp42) favor sugar dissociation. Release of the sugar allows Asp42 to close with Arg142 which directs  $pK_a$  changes that favor deprotonation (bottom; left). Deprotonation and the Asp42-Arg142 salt bridge destabilize the inward open state and induce transition towards a more stable outward open state favored by interactions of the intracellular networks of salt bridges and the N domain SP-A network.

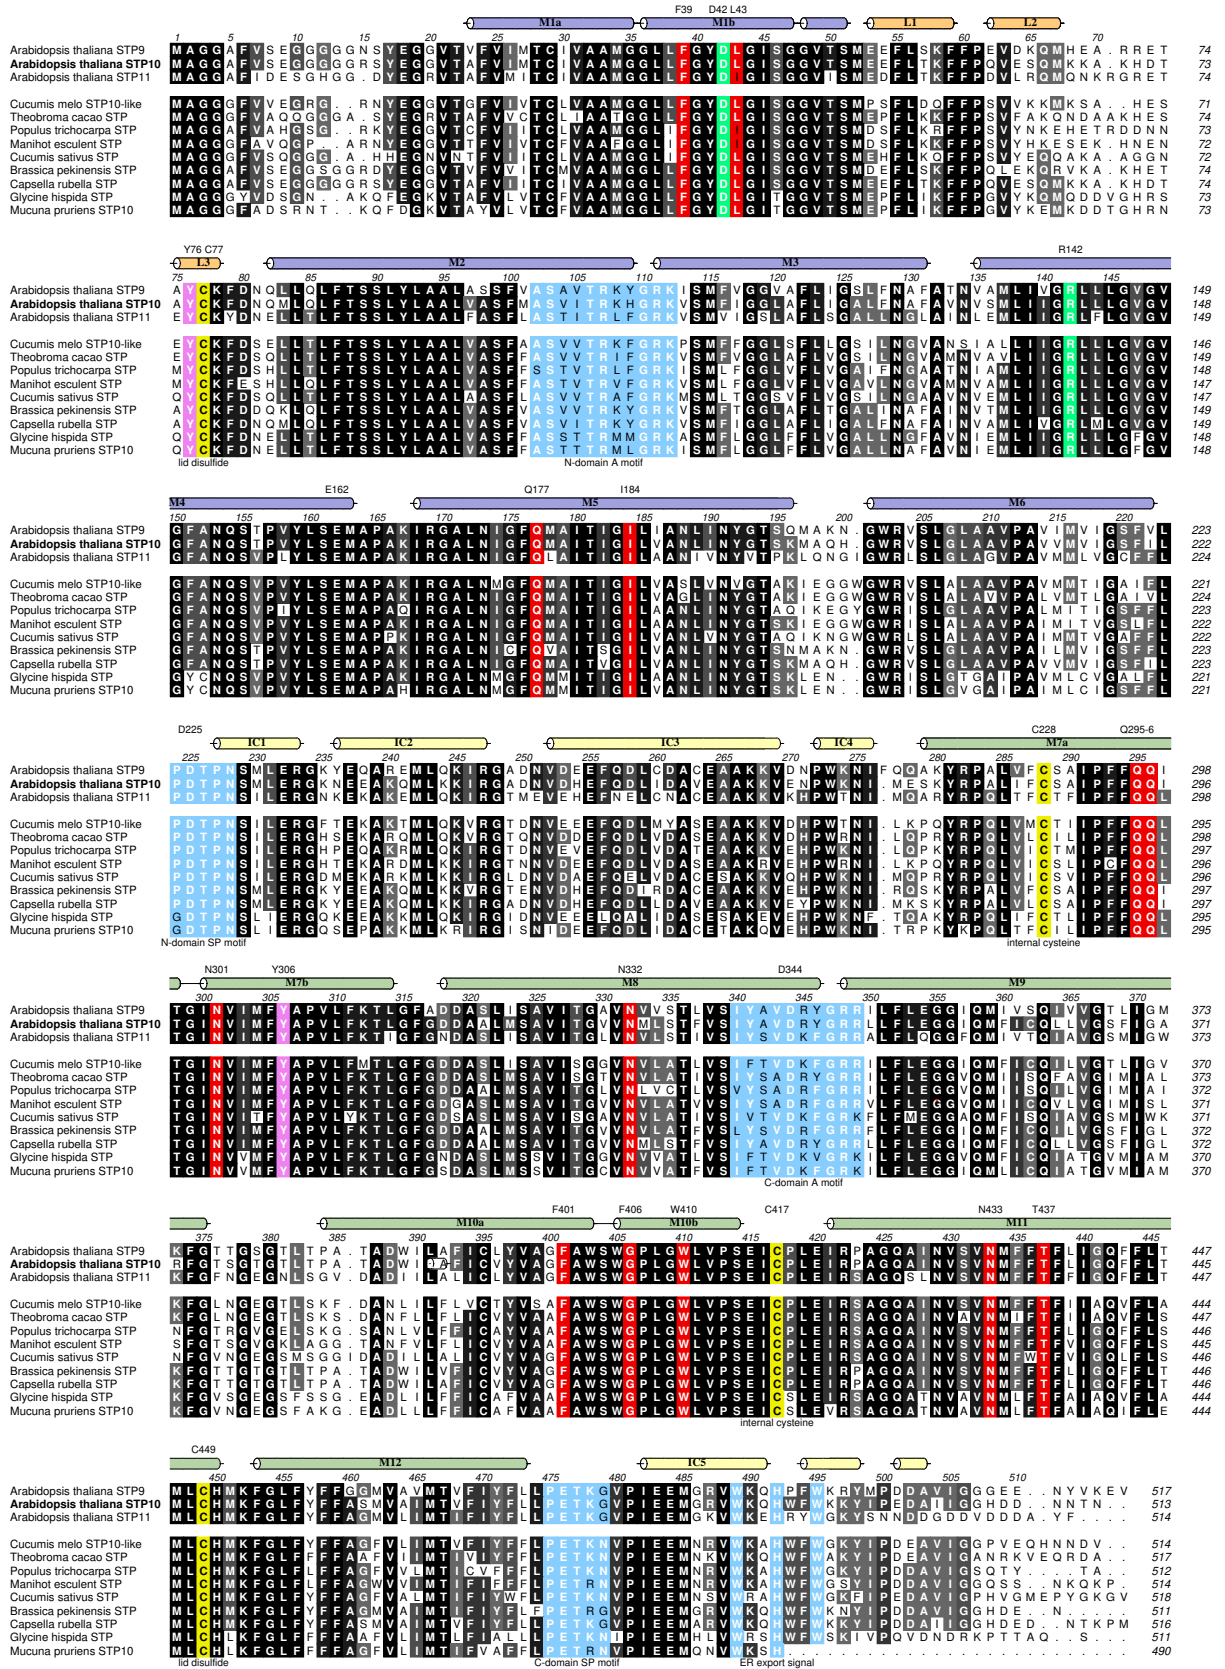

Extended Data Fig. S1 | Continued on the following page.

**Extended Data Fig. S1 | Multiple sequence alignment of the *A. thaliana* Sugar Transport Family STP9, STP10, STP11 with other plant STPs included.**

Alignment between *A. thaliana* STP9 (accession number Q9SX48), *A. thaliana* STP10 (accession number Q9LT15), *A. thaliana* STP11 (accession number Q9FMX3), *Cucumis melo* cmSTP10-like (accession number A0A5A7SS92), *Theobroma cacao* tcSTP (accession number A0A061E224), *Populus trichocarpa* ptSTP (accession number B9H5Q5), *Manihot esculent* meSTP (accession number A0A2C9V070), *Cucumis sativus* csSTP (accession number A0A0A0LHS6), *Brassica pekinensis* bpSTP (accession number M4FAX8), *Capsella rubella* crSTP (accession number R0I4Q9), *Glycine hispida* ghSTP (accession number I1LF83) and *Mucuna pruriens* mpSTP10 (accession number A0A371FNF1). Conserved residues are highlighted with gray-scale, where black is perfectly conserved. Colored tubes represent  $\alpha$ -helices found in the N domain (blue), Lid domain (orange), ICH domain (pale yellow) and C domain (green). Key residues are numbered above the  $\alpha$ -helix markings. Residues highlighted in red participate in sugar binding. The proton donor/acceptor pair is highlighted in green. The cysteines forming the disulfide bridge between Lid domain and C domain as well as the cysteines at the intracellular interface are highlighted in yellow. The tyrosines involved in exofacial gating are highlighted in magenta. Conserved motifs are highlighted in light blue.



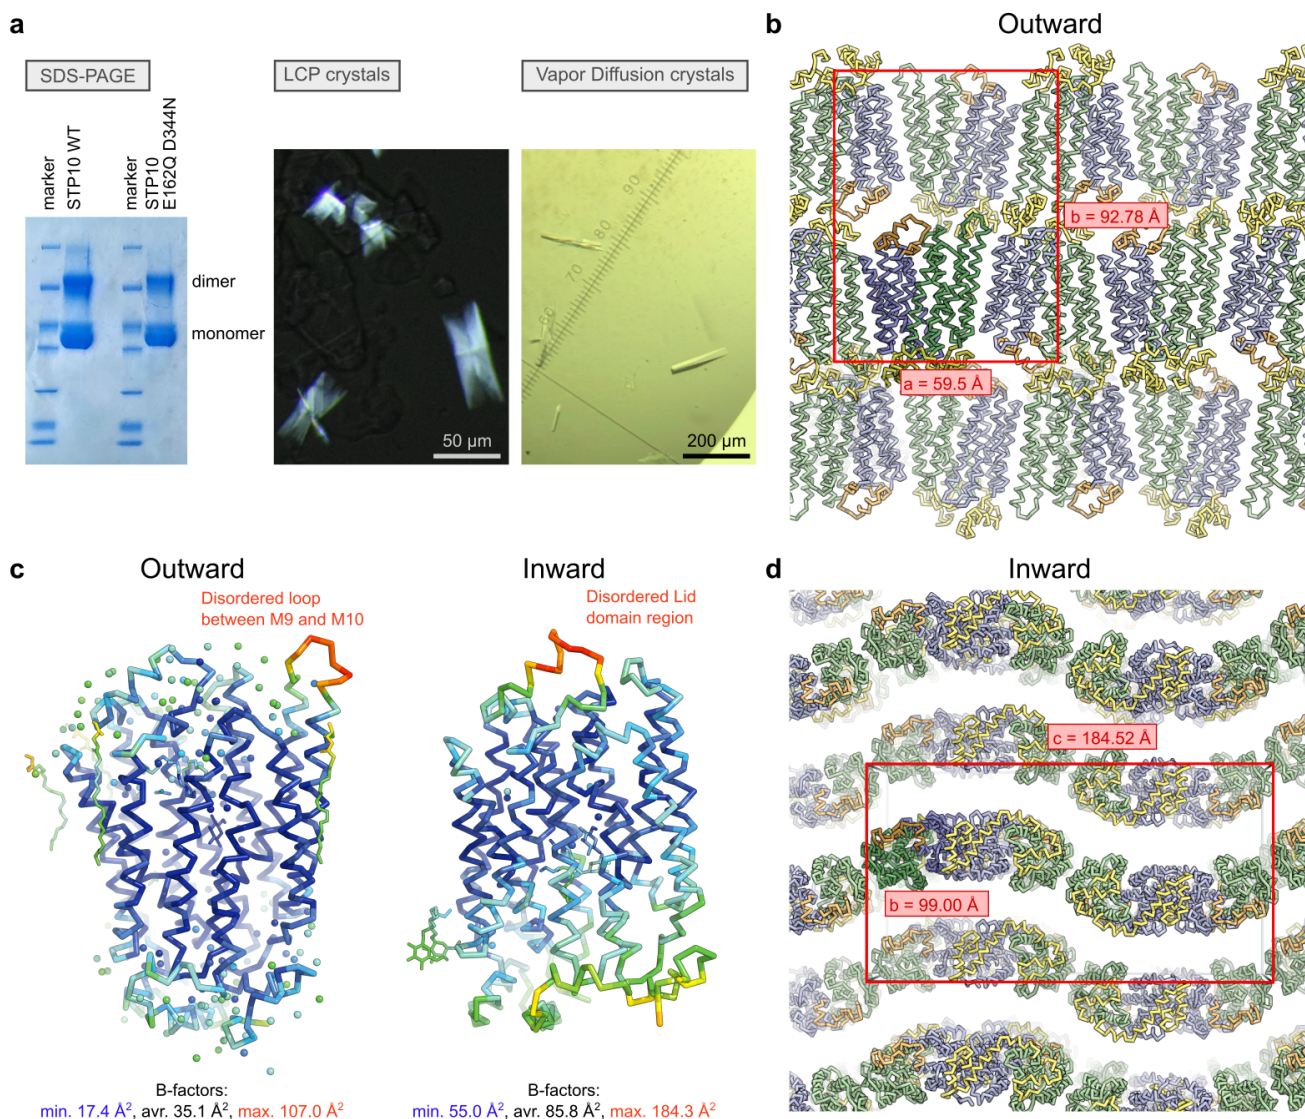

### Extended Data Fig. S2 | Crystals and components of the asymmetric unit.

**a)** SDS-PAGE gel of STP10 protein and polarized light photo of STP10 wild type crystals and light photo of STP10 E162Q D344N crystals.

**b)** Asymmetric unit and crystal packing of STP10 wild type. The unit cell is viewed perpendicular to the *ab*-plane, and the *a* and *b* axis highlighted in red. The asymmetric unit contains one molecule of STP10, as highlighted in darker colors. The packing is an example of type I packing normally obtained by LCP crystallography with the transmembrane regions packing in a lipid bilayer and a relatively low solvent content (58%).

**c)** The backbone of STP10 outward occluded structure and inward open structure colored by the atomic displacement factor (B-factor) with a rainbow gradient from low/blue to high/red. There is a disordered loop between M9 and M10 with a significantly higher B-factor than the rest of the model in the outward structure and a disordered part of the Lid domain with significant higher B-factor than the rest of the model in the inward open structure.

**d)** Asymmetric unit and crystal packing of STP10 E162Q D344N. The unit cell is viewed perpendicular to the *bc*-plane, and the *b* and *c* axis highlighted in red. The asymmetric unit contains one molecule of STP10, as highlighted in darker colors.

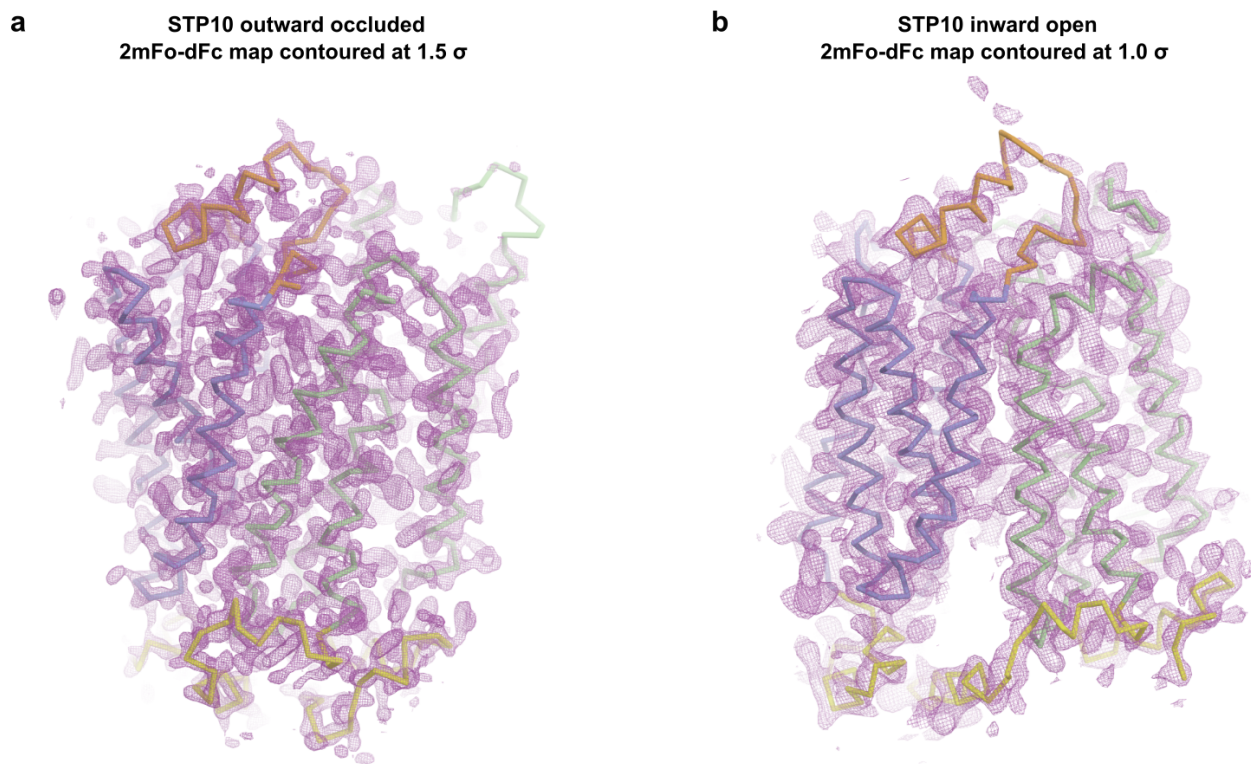

**Extended Data Fig. S3 | Electron density for the STP10 outward occluded structure and the STP10 inward open structure.**

**a)** Weighted 2FoFc density at 1.5 sigma of the asymmetric unit of 1.8 Å resolution STP10 outward occluded structure with the final model overlaid.

**b)** Weighted 2FoFc density at 1.0 sigma of the asymmetric unit of 2.6 Å resolution STP10 inward open structure with the final model overlaid.



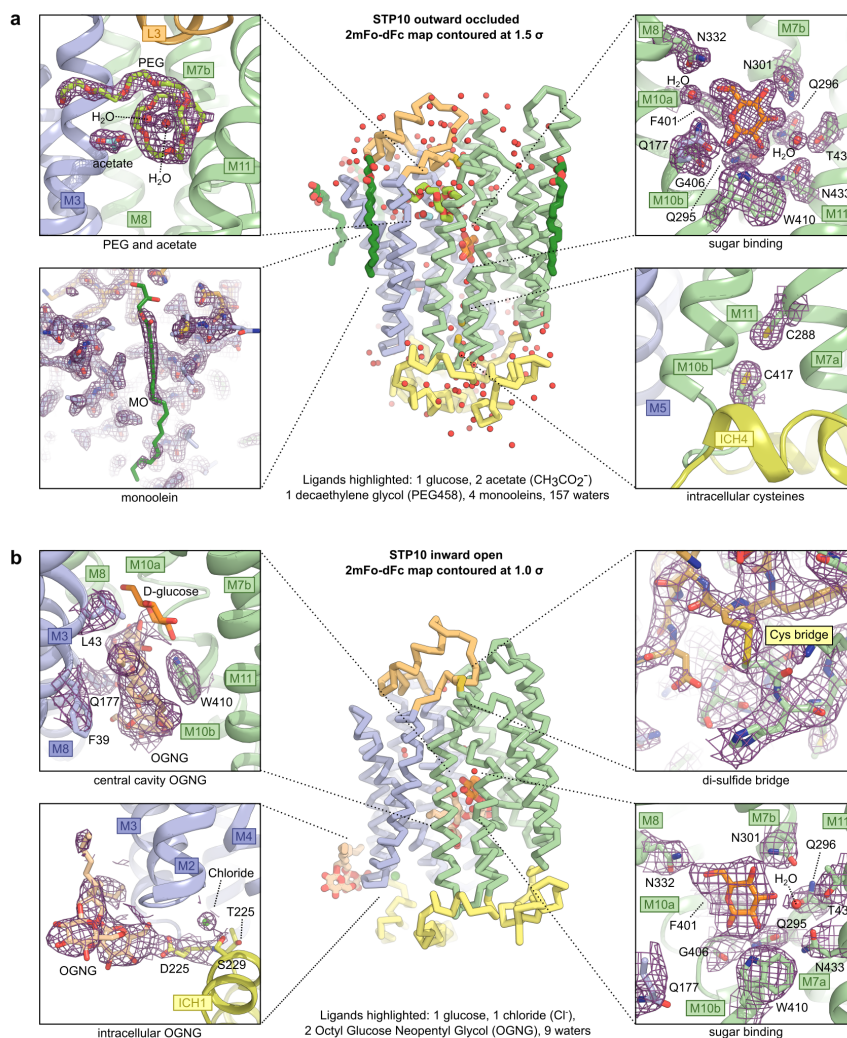

### Extended Data Fig. S4 | Electron density for selected components of STP10 structures.

**a)** Backbone representation of STP10 outward structure with all heterologous molecules found in the density highlighted. Besides STP10 the model contains 1 glucose, 2 acetate, 1 PEG 458, 4 monoolein molecules and 157 waters. The four inserts highlight quality of the electron density displayed by the weighted 2FoFc density at 1.5 sigma for the PEG and acetate, glucose, intracellular cysteines and of the monoolein, which was weaker and is clearer at lower sigma levels than 1.5.

**b)** Backbone representation of STP10 inward structure with all the heterologous molecules found in the density highlighted. Besides STP10 the model contains 1 glucose, 1 chloride ion, 2 OGNG and 9 waters. The four inserts highlight quality of the electron density displayed by the weighted 2FoFc density at 1.0 sigma for the two OGNG, glucose and the disulfide bridge.

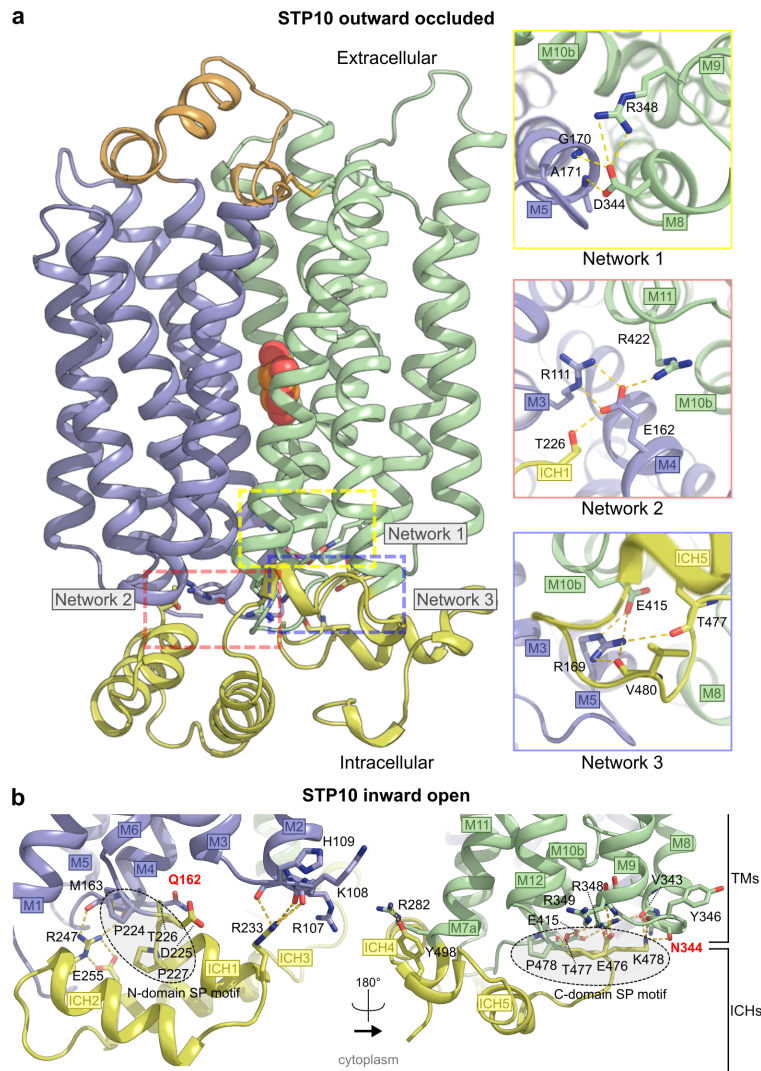

### Extended Data Fig. S5 | The intracellular gate in the two STP10 structures.

**a)** View of the STP10 outward occluded structure perpendicular to the membrane with the three key interdomain salt bridge networks highlighted in colored squares. In particular constituted by the double salt bridge from D344(M8) to the main chain nitrogen of Gly170(M5) and Ala171(M5) (network 1) and the double salt bridge from Glu162 (M4) to Arg422(M11), Thr226 (IC1) and R111(M3) (network 2) as well as and from Arg169(M5) to E415 (M10), the main chain carbonyls of Thr477 (IC5) and Val480 (IC5) (network 3). These regions are perfectly conserved in all STPs (Extended Data Fig. S1) and several bacterial symporters, and have also been observed in human sugar facilitators.

**b)** Close-up view of the N domain and C domain at the cytosolic side in the STP10 inward open structure. In the inward open conformation, interactions between the ICH domain and the transmembrane N and C domains are maintained. Interactions between ICH and the two transmembrane domain residues are highlighted by yellow dashes. The mutant residues Q162 and N344 that broke the stabilizing networks are highlighted in red. The positions of the SP motifs are highlighted (dotted eclipses).

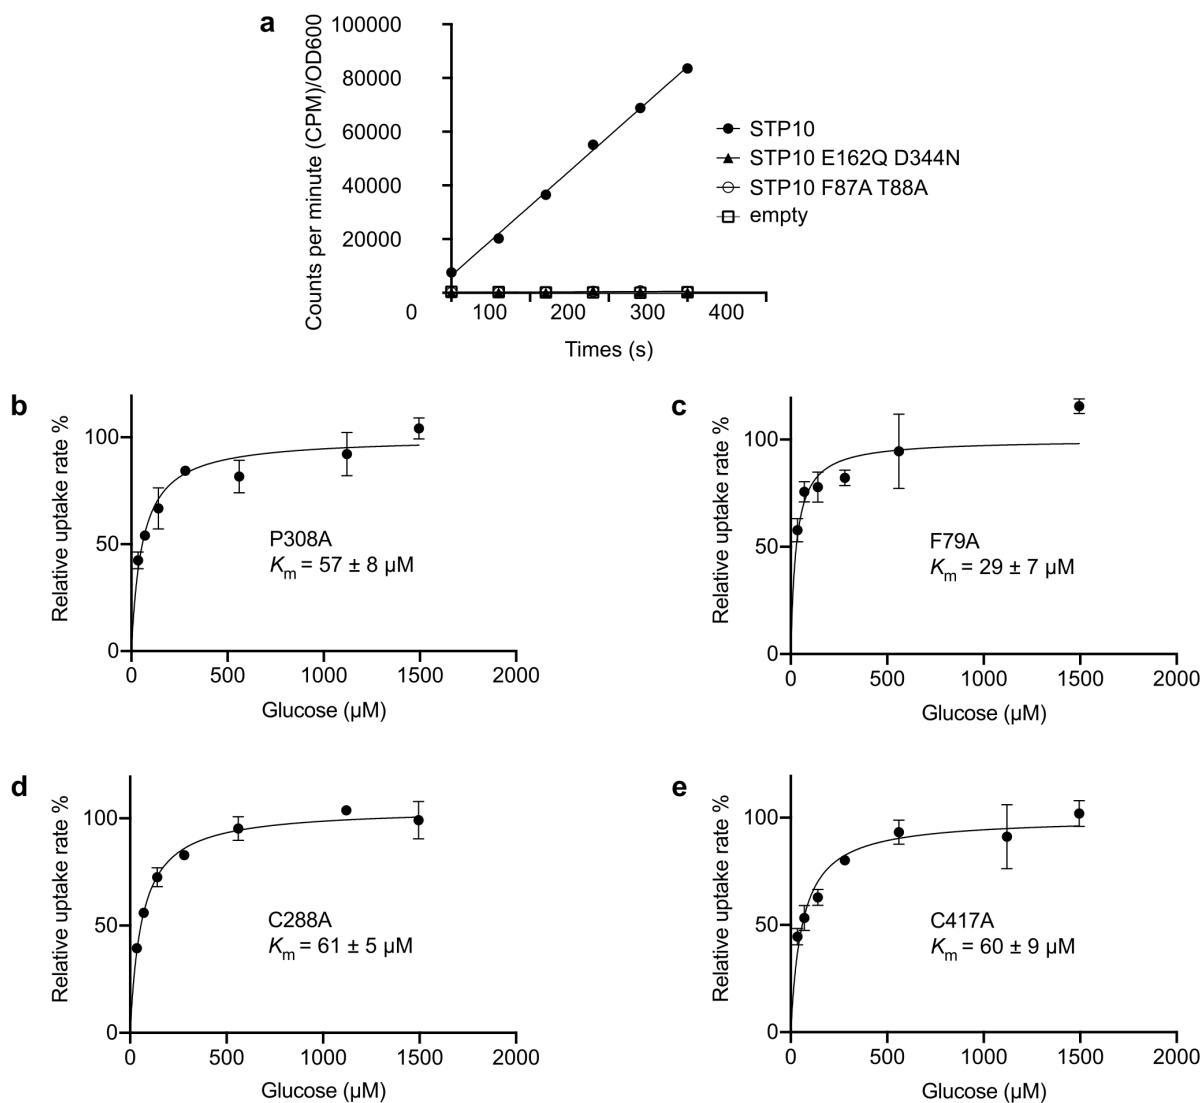

### Extended Data Fig. S6 | Functional characterization of STP10 mutants.

**a)** Uptake of glucose into EBY.VW4000 yeast strain expressing STP10 (black circles), STP10 E162Q D344N (black triangle), STP10 F87A T88A (empty circles) or empty plasmid (empty squares) per OD600 of cells at an initial outside concentration of 100  $\mu\text{M}$  glucose at pH 5.0.

**b-d)** Michaelis-Menten fit to glucose titration of STP10 mutants at pH 5.0. Data represents mean  $\pm$  SD of three or more replicate experiments.

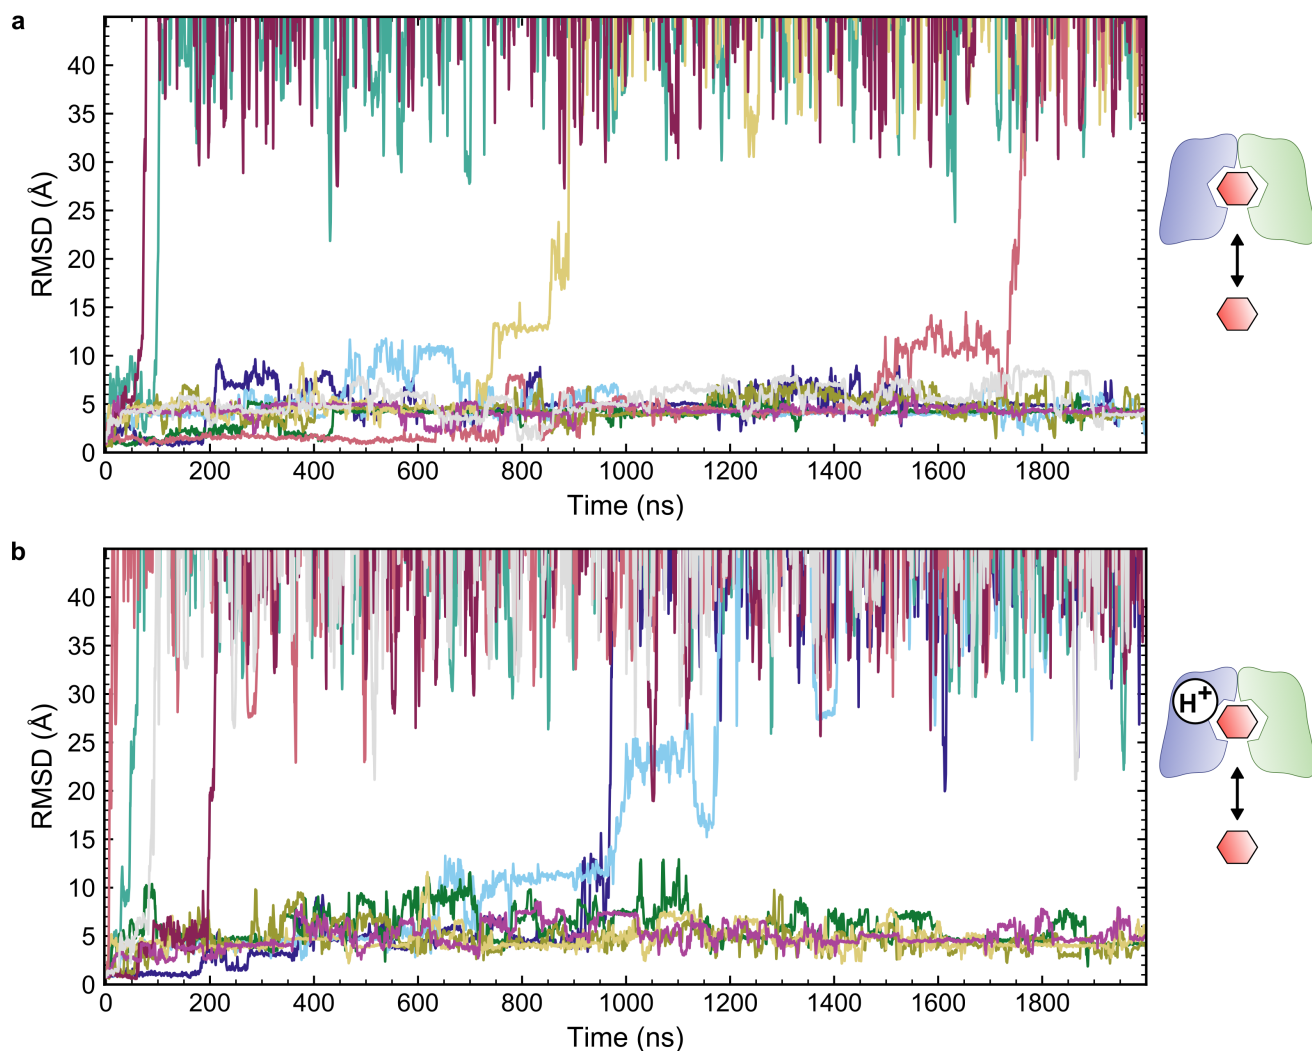

**Extended Data Fig. S7 | Molecular dynamics simulations of the glucose binding site of STP10 inward open states**

**a)** R.m.s.d. ligand plot of the charged inward open state simulations. The glucose leaves the inward state in 4 of 10 independent repeats with Asp42 charged.

**b)** R.m.s.d. ligand plot of the neutral inward open state simulations. The glucose leaves the inward state in 6 of 10 independent repeats with Asp42 neutral. Repeats are represented by different color traces same as for Fig. 3d. The ligand RMSD is calculated after aligning the protein structure to the initial model.

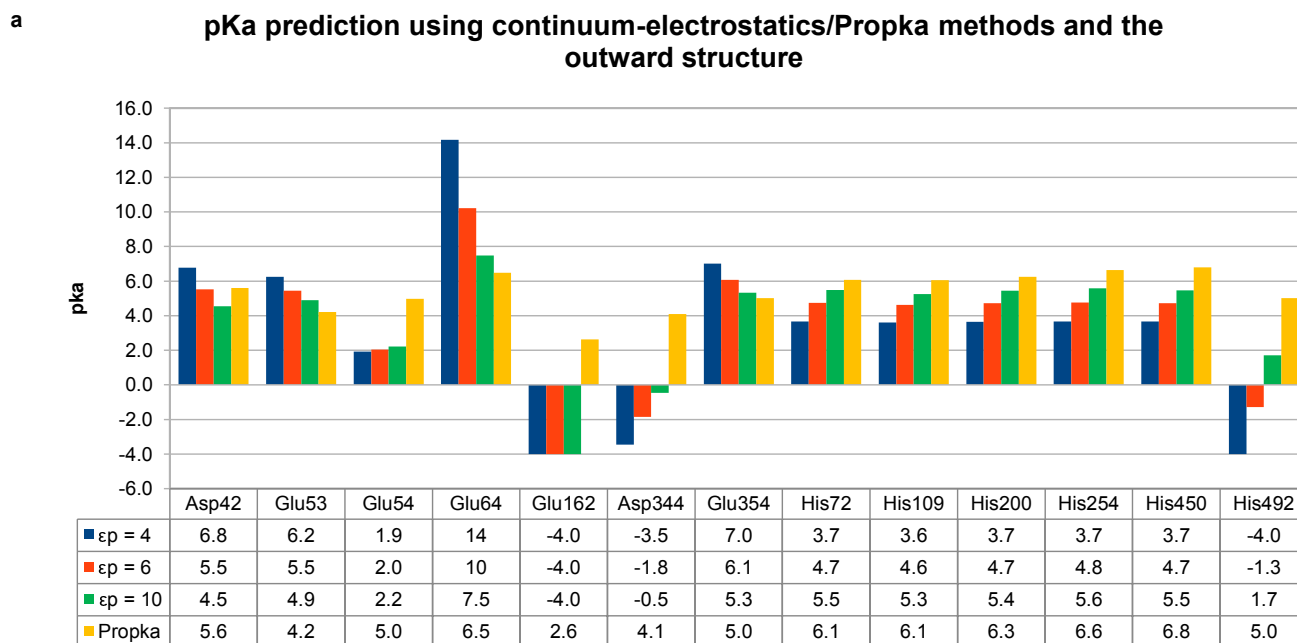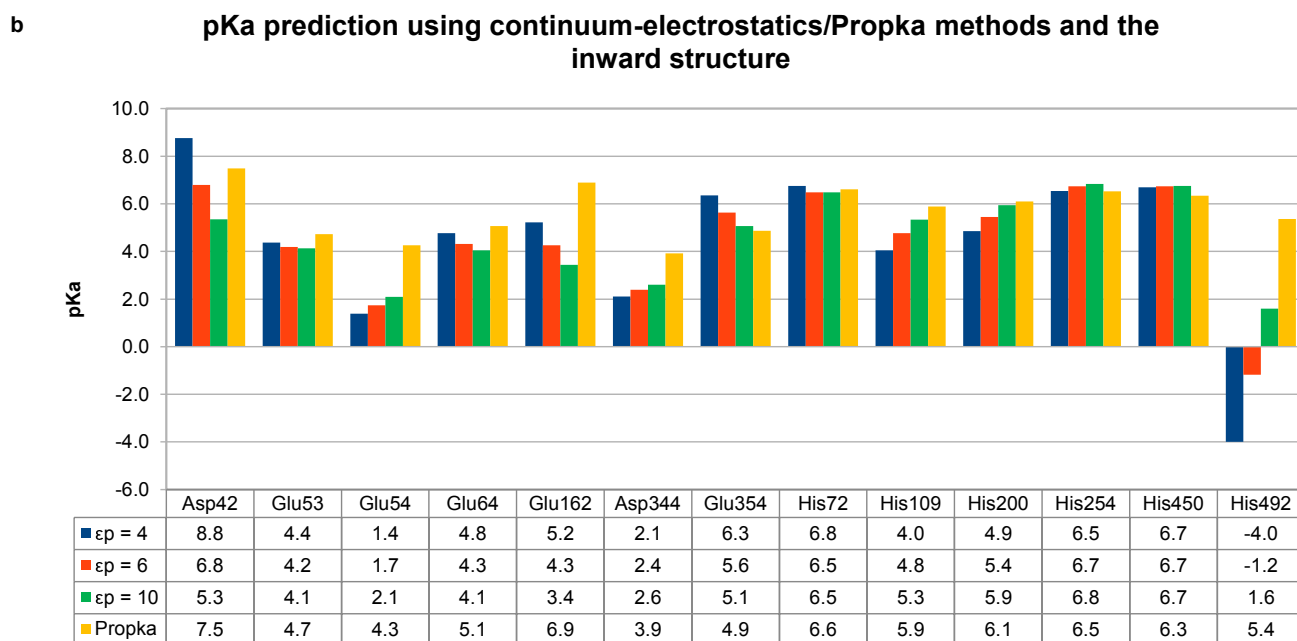

**Extended Data Fig. S8 | Continuum electrostatics and empirical pK<sub>a</sub> calculations for the two structures.**

**a)** pK<sub>1/2</sub> for titratable residues in STP10 for the outward crystal structure with different dielectric constant values for the protein (4, 6 and 10). Glu162 has pK<sub>1/2</sub> values < -4 for all three dielectric constant values. His492 has pK<sub>1/2</sub> < -4 for a dielectric constant of 4. Predicted pK<sub>a</sub> using Propka3.0, an empirical method. See subsection Protonation states assignment in Methods for calculation details.

**b)** pK<sub>1/2</sub> for titratable residues in STP10 for the inward crystal structure with different dielectric constant values for the protein (4, 6 and 10). Predicted pK<sub>a</sub> using the empirical method Propka3.0. See subsection Protonation states assignment in Methods for calculation details.



| Name                           | STP10                               | STP10 E162Q/D344N                   | STP10 E162Q/D344N                   |
|--------------------------------|-------------------------------------|-------------------------------------|-------------------------------------|
| Type                           | native                              | native                              | bromide                             |
| State                          | outward occluded                    | inward open                         | inward open                         |
| <b>Data Collection</b>         |                                     |                                     |                                     |
| Space group                    | P 21 21 21                          | C 2 2 21                            | C 2 2 21                            |
| Cell dimensions                |                                     |                                     |                                     |
| a, b, c (Å)                    | 59.5 92.8 119.8                     | 83.9 99.0 184.5                     | 84.2 98.4 185.0                     |
| alpha, beta, gamma (deg)       | 90 90 90                            | 90 90 90                            | 90 90 90                            |
| Monomers per asym. unit.       | 1                                   | 1                                   | 1                                   |
| Wavelength (Å)                 | 0.9794                              | 0.9800                              | 0.9203                              |
| Number of reflections measured | 676,392                             | 152,793                             | 243,873                             |
| Number of unique reflections   | 61,268                              | 23,016                              | 18,668                              |
| Resolution (Å)                 | 46.39-1.81 (1.84-1.81) <sup>a</sup> | 92.26-2.64 (2.69-2.64) <sup>a</sup> | 24.88-3.50 (4.00-3.50) <sup>a</sup> |
| Rmeas (%)                      | 17.6 (262.3)                        | 13.44 (149.6)                       | 137.9 (103.1)                       |
| Mean I/σ(I)                    | 7.7 (1.03)                          | 6.6 (0.93)                          | 9.9 (3.03)                          |
| CC(1/2)                        | 99.8 (65.1)                         | 98.7(73.9)                          | 93.9 (96.8)                         |
| Completeness (%)               | 100 (98.7)                          | 100 (99.9)                          | 99.6 (99.9)                         |
| Redundancy                     | 11.0 (11.0)                         | 6.6 (6.8)                           | 13.0 (13.1)                         |
| <b>Refinement</b>              |                                     |                                     |                                     |
| Resolution (Å)                 | 46.39-1.81 (1.875-1.81)             | 19.52-2.64 (2.734-2.64)             |                                     |
| No. reflections (work/free)    | 61,084 / 3,030                      | 22,480 / 1,092                      |                                     |
| Rwork (%)                      | 18.74                               | 24.66                               |                                     |
| Rfree (%)                      | 21.20                               | 27.79                               |                                     |
| No. of Atoms                   |                                     |                                     |                                     |
| Protein                        | 3,771                               | 3760                                |                                     |
| Ligands                        | 151                                 | 91                                  |                                     |
| Waters                         | 157                                 | 9                                   |                                     |
| Average B Factors (Å)          |                                     |                                     |                                     |
| Overall                        | 37.45                               | 85.87                               |                                     |
| Protein                        | 36.50                               | 85.75                               |                                     |
| Ligands                        | 55.13                               | 92.33                               |                                     |
| Waters                         | 43.21                               | 72.35                               |                                     |
| RMSD                           |                                     |                                     |                                     |
| Bond lengths (Å)               | 0.007                               | 0.005                               |                                     |
| Bond angles (deg)              | 0.77                                | 0.83                                |                                     |
| Ramachandran Plot Statistics   |                                     |                                     |                                     |
| Favored regions                | 99.18                               | 96.27                               |                                     |
| Allowed regions                | 0.82                                | 3.73                                |                                     |
| Disallowed regions             | 0.0                                 | 0.0                                 |                                     |
| Deposited model (PDB id)       | 7AAQ                                | 7AAR                                |                                     |

<sup>a</sup> Highest resolution shell is shown in parenthesis.

### Extended Data Table S1 | Data collection and refinement statistics.

| <b>Outward state with glucose and charged Arg142</b>   | $\Delta G$ (kcal/mol) | error (kcal/mol) | $\Delta\Delta G$ (kcal/mol) | error (kcal/mol) | $pK_a$     | error |
|--------------------------------------------------------|-----------------------|------------------|-----------------------------|------------------|------------|-------|
| repeat 1                                               | -52                   | 0.28             | 7.28                        | 0.28             | 9.1        | 0.2   |
| repeat 2                                               | -53.1                 | 0.15             | 6.18                        | 0.15             | 8.4        | 0.1   |
| repeat 3                                               | -52.8                 | 0.39             | 6.51                        | 0.39             | 8.6        | 0.3   |
| repeat 4                                               | -53                   | 0.1              | 6.33                        | 0.11             | 8.5        | 0.08  |
| repeat 5                                               | -52.5                 | 0.22             | 6.79                        | 0.22             | 8.8        | 0.2   |
| <b>Average</b>                                         | <b>-52.7</b>          |                  | <b>6.62</b>                 |                  | <b>8.7</b> |       |
| Std. Dev.                                              | 0.43                  |                  | 0.43                        |                  | 0.3        |       |
| <b>Outward state with glucose and neutral Arg142</b>   | $\Delta G$ (kcal/mol) | error (kcal/mol) | $\Delta\Delta G$ (kcal/mol) | error (kcal/mol) | $pK_a$     | error |
| repeat 1                                               | -41.8                 | 0.12             | 17.5                        | 0.12             | 16         | 0.09  |
| repeat 2                                               | -41.9                 | 0.14             | 17.4                        | 0.14             | 16         | 0.1   |
| repeat 3                                               | -42.1                 | 0.31             | 17.2                        | 0.31             | 16         | 0.2   |
| repeat 4                                               | -42.9                 | 0.29             | 16.4                        | 0.29             | 16         | 0.2   |
| repeat 5                                               | -41.4                 | 0.53             | 17.9                        | 0.53             | 17         | 0.4   |
| <b>Average</b>                                         | <b>-42.0</b>          |                  | <b>17.3</b>                 |                  | <b>16</b>  |       |
| Std. Dev.                                              | 0.56                  |                  | 0.56                        |                  | 0.4        |       |
| <b>Inward state with glucose and charged Arg142</b>    | $\Delta G$ (kcal/mol) | error (kcal/mol) | $\Delta\Delta G$ (kcal/mol) | error (kcal/mol) | $pK_a$     | error |
| repeat 1                                               | -44.6                 | 0.27             | 14.7                        | 0.27             | 14         | 0.2   |
| repeat 2                                               | -47.1                 | 0.35             | 12.2                        | 0.35             | 13         | 0.2   |
| repeat 3                                               | -43.4                 | 0.75             | 15.9                        | 0.75             | 15         | 0.5   |
| repeat 4                                               | -43.1                 | 0.58             | 16.2                        | 0.58             | 15         | 0.4   |
| repeat 5                                               | -45.2                 | 0.29             | 14.1                        | 0.29             | 14         | 0.2   |
| <b>Average</b>                                         | <b>-44.7</b>          |                  | <b>14.6</b>                 |                  | <b>14</b>  |       |
| Std. Dev.                                              | 1.6                   |                  | 1.6                         |                  | 1          |       |
| <b>Inward state with glucose and neutral Arg142</b>    | $\Delta G$ (kcal/mol) | error (kcal/mol) | $\Delta\Delta G$ (kcal/mol) | error (kcal/mol) | $pK_a$     | error |
| repeat 1                                               | -31.8                 | 0.74             | 27.5                        | 0.74             | 23         | 0.5   |
| repeat 2                                               | -41.6                 | 0.11             | 17.7                        | 0.11             | 16         | 0.08  |
| repeat 3                                               | -35.9                 | 0.51             | 23.4                        | 0.51             | 21         | 0.4   |
| repeat 4                                               | -37.8                 | 0.17             | 21.5                        | 0.17             | 19         | 0.1   |
| repeat 5                                               | -39.4                 | 0.049            | 19.9                        | 0.059            | 18         | 0.04  |
| <b>Average</b>                                         | <b>-37.3</b>          |                  | <b>22.0</b>                 |                  | <b>19</b>  |       |
| Std. Dev.                                              | 3.7                   |                  | 3.7                         |                  | 3          |       |
| <b>Inward state without glucose and charged Arg142</b> | $\Delta G$ (kcal/mol) | error (kcal/mol) | $\Delta\Delta G$ (kcal/mol) | error (kcal/mol) | $pK_a$     | error |
| repeat 1                                               | -49.8                 | 0.093            | 9.53                        | 0.098            | 11         | 0.07  |
| repeat 2                                               | -46.5                 | 0.48             | 12.8                        | 0.48             | 13         | 0.3   |
| repeat 3                                               | -49.3                 | 0.33             | 9.95                        | 0.34             | 11         | 0.2   |
| repeat 4                                               | -45.5                 | 0.76             | 13.8                        | 0.76             | 14         | 0.5   |
| repeat 5                                               | -48.1                 | 0.43             | 11.2                        | 0.43             | 12         | 0.3   |
| <b>Average</b>                                         | <b>-47.8</b>          |                  | <b>11.5</b>                 |                  | <b>12</b>  |       |
| Std. Dev.                                              | 1.8                   |                  | 1.8                         |                  | 1          |       |
| <b>Model peptide</b>                                   | $\Delta G$ (kcal/mol) | error (kcal/mol) |                             |                  |            |       |
| Asp                                                    | -59.3                 | 0.033            |                             |                  |            |       |

### Extended Data Table S2 | Predicted $pK_a$ values of Asp42 for outward and inward structures using an ensemble of FEP MD simulations.

Free-energy calculations were carried out using the FEP method to analyze the  $pK_a$  shifts of Asp42 with different protonation states of Arg142 and with/without glucose. Five independent repeats were performed for each set of calculations, and the average and standard deviation are reported.  $\Delta G$ : free energy of charging Asp142 in the protein or in a capped peptide (model).  $\Delta\Delta G$  change of free energy of charging Asp142 in the protein relative to a peptide with neutral caps.  $pK_a$  calculated using  $\Delta\Delta G$ ,  $T = 310$  K, and the experimental  $pK_a$  of Asp in solution ( $pK_a = 4.0$ ).  $\Delta G$  errors are estimated using block averaging with five blocks and then propagated during calculations of  $\Delta\Delta G$  and  $pK_a$ . See subsection Free-energy perturbation calculations in Methods for detailed information.
